# Supplementary material for: Organocatalysis by an aprotic imidazolium zwitterion: regioselective ring-opening of aziridines and applicable to gram scale synthesis
Source: Royal Society of Chemistry journal article supplement (doi:10.1039/c5gc01323b), 2015-08-24
Supplement: c5gc01323b1.pdf [file c5gc01323b1.pdf]

## Supporting Information

### Organocatalysis by an aprotic imidazolium zwitterion: regioselective ring-opening of aziridines and applicable on gram scale synthesis

Nirrita Chakraborty Ghosal, Sougata Santra, Sudarshan Das, Alakananda Hajra, Grigory V. Zyryanov, and Adinath Majee\*

### Contents

|                                                                         |       |       |        |
|-------------------------------------------------------------------------|-------|-------|--------|
| Copies of $^1\text{H}$ & $^{13}\text{C}$ NMR Spectra of all compounds 3 | ..... | ..... | S2-S43 |
|-------------------------------------------------------------------------|-------|-------|--------|

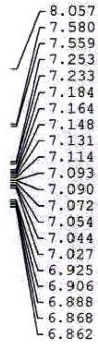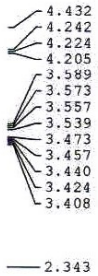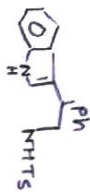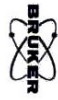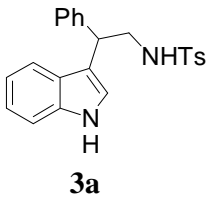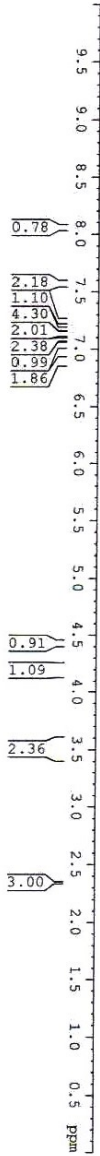

Current Data Parameters  
 NAME Dr. A HAURA 2014  
 EXPNO 1289  
 F2 - Acquisition Parameters  
 Date\_ 20141218  
 Time 17:45  
 INSTRUM spect  
 PROBRD 5 mm PABBO BB/  
 PULPROG zg30  
 TD 32768  
 SOLVENT CDCl3  
 NS 24  
 DS 2  
 SWH 8223.685 Hz  
 FIDRES 0.250967 Hz  
 AQ 1.9923444 sec  
 RG 62.69  
 DW 60.800 usec  
 DE 5.50 usec  
 TE 295.6 K  
 D1 1.00000000 sec  
 TDO 1

==== CHANNEL f1 =====  
 NUCL 1H  
 P1 14.75 usec  
 PLM1 11.9949989 W  
 SFO1 400.1524711 MHz

F2 - Processing parameters  
 SI 16384  
 SF 400.1500450 MHz  
 SSB EM  
 GB 0  
 PC 1.00

- 143.59
- 141.14
- 136.84
- 136.61
- 129.86
- 128.87
- 128.08
- 127.23
- 127.13
- 126.56
- 122.48
- 122.16
- 119.72
- 119.24
- 115.61
- 111.43

- 77.48
- 77.16
- 76.84

- 47.56
- 42.74

- 21.66

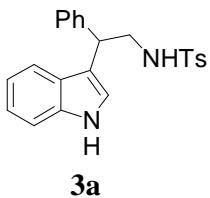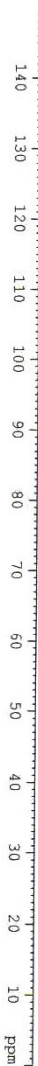

Current Data Parameters  
 NAME VBNC-158  
 EXPNO 1290  
 PROCNO 1  
 F2 - Acquisition Parameters  
 Date\_ 2014.12.21  
 Time 18.21  
 INSTRUM spect  
 PROBHD 5 mm PABBO BB/  
 PULPROG zgpg30  
 TD 32768  
 SOLVENT CDCl3  
 NS 320  
 DS 2  
 SWH 24038.461 Hz  
 FIDRES 0.733596 Hz  
 AQ 0.6816244 sec  
 SFO 500.136444 MHz  
 LW 20.800 usec  
 DE 6.50 usec  
 TE 296.5 K  
 D1 2.00000000 sec  
 D11 0.03000000 sec  
 TD0 1

===== CHANNEL F1 =====  
 NU1 13C  
 PL1 8.90 usec  
 PL2 54.00000000 usec  
 SFO1 100.6278588 MHz

===== CHANNEL F2 =====  
 CPDPRG2 waltz16  
 PC 1.40  
 F2 100.6278588 MHz  
 NU2 1H  
 PL2 80.10 usec  
 PL3 12.00000000 usec  
 PL4 0.407792999 W  
 PL5 0.26107001 W  
 SF02 400.1516006 MHz

F2 - Processing parameters  
 SI 16384  
 SF 100.6177850 MHz  
 WDW EM  
 SSB 0  
 GB 0  
 PC 1.00 Hz

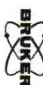

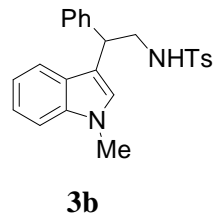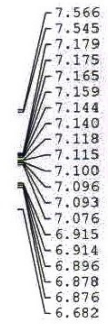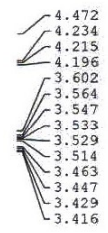

2.331

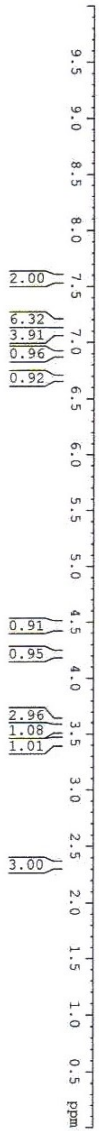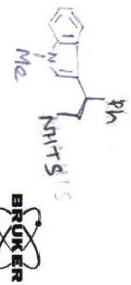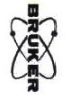

Current Data Parameters  
NAME DL\_A\_HA01A\_214  
EXPNO 1320  
PROCNO 1

F2 - Acquisition Parameters  
Date\_ 20141228  
Time\_ 15.42

INSTRUM spect  
PROBHD 5 mm PABBO BB/  
PULPROG zg30

TD 32768  
SOLVENT CDCl3

NS 24  
DS 2

SWH 8223.685 Hz  
FIDRES 0.250967 Hz

AQ 1.9923444 sec  
RG 40.67

DM 60.80 usec  
DE 4.50 usec

TE 29.5 K  
D1 1.00000000 sec

TDO 1

===== CHANNEL f1 =====  
NUC1 1H  
PI 14.75 usec  
PLM1 11.9949989 W  
SFO1 400.1524711 MHz

F2 - Processing Parameters  
SI 16384  
SF 400.1500554 MHz  
WDW EM  
SSB 0  
LB 0.30 Hz  
GB 0  
FC 1.00



143.49  
141.29  
137.32  
136.86  
129.80  
128.82  
128.02  
127.22  
127.04  
126.97  
126.83  
122.03  
119.30  
119.22  
114.03  
109.46

77.48  
77.16  
76.85

47.59  
42.67  
32.83  
21.63

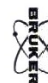

Current Data Parameters  
NAME B1-A18VBA-2014  
EXPNO 1321  
PROCNO 1

F2 - Acquisition Parameters  
Date\_ 20140226  
Time 16:09  
INSTRUM spect  
PROBHD 5 mm PWBH BB/  
PULPROG zgpg30  
TD 65536  
SOLVENT CDCl3  
NS 512  
DS 2  
SWH 24038.461 Hz  
FIDRES 0.681324 Hz  
RG 40.67 sec  
DW 20.800 usec  
DE 6.50 usec  
TE 296.6 K  
D1 2.00000000 sec  
D11 0.03000000 sec  
TDO 1

===== CHANNEL f1 =====  
NUC1 13C  
P1 8.90 usec  
PL1 54.00000000 W  
SFO1 100.6278588 MHz

===== CHANNEL f2 =====  
CDEPRG2 waltz16  
NUC2 1H  
PCPD2 80.00 usec  
PLM2 12.00000000 W  
PLM1 0.40732099 W  
SFO2 400.1516006 MHz

F2 - Processing parameters  
SI 16384 MHz  
RG 100.617738 EM  
RWDW 0  
SSB 0  
LB 1.00 Hz  
GB 0  
PC 1.40

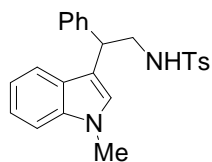

3b

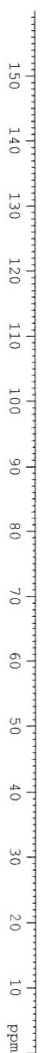

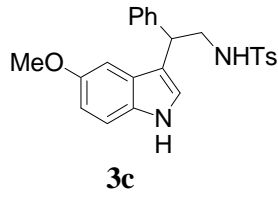

- 7.990
- 7.565
- 7.545
- 7.170
- 7.154
- 7.135
- 7.116
- 7.113
- 7.107
- 7.103
- 7.086
- 6.825
- 6.743
- 6.737
- 6.721
- 6.715
- 6.613
- 6.607

- 4.467
- 4.216
- 4.197
- 4.178
- 3.627
- 3.594
- 3.565
- 3.550
- 3.535
- 3.521
- 3.459
- 3.441
- 3.425
- 3.411
- 3.395

2.332

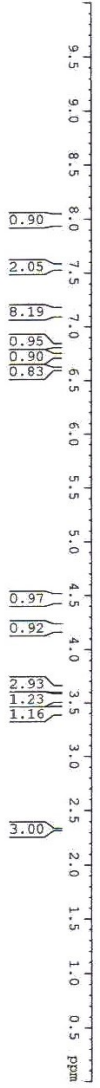

Current Data Parameters  
 NAME Dr. A HAJRA 2014  
 EXPNO 1349  
 PROCNO 1

F2 - Acquisition Parameters  
 Date\_ 20191010  
 Time 17:44  
 INSTRUM spect  
 PROBHD 5 mm PABBO BB/  
 PULPROG zg30  
 TD 32768  
 SOLVENT CDCl3  
 NS 32  
 DS 2  
 SWH 8223.685 Hz  
 FIDRES 0.250967 Hz  
 AQ 1.923444 sec  
 RG 60  
 DS 60  
 DE 6.50 usec  
 TE 296.5 K  
 D1 1.00000000 sec  
 TDO 1

CHANNEL F1  
 NUCL1 1H  
 P1 14.75 usec  
 PL1 11.99449969 W  
 SFO1 400.1524711 MHz

F2 - Processing Parameters  
 SI 16384  
 SF 400.1500445 MHz  
 WDW EM  
 SSB 0  
 LB 0.30 Hz  
 GB 1.00

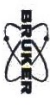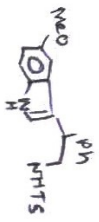

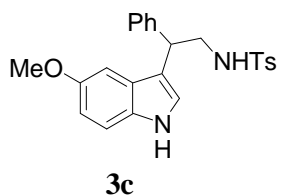

- 154.03
- 143.58
- 141.07
- 136.83
- 131.75
- 129.83
- 128.85
- 128.09
- 127.20
- 127.12
- 126.99
- 122.94
- 115.28
- 112.59
- 112.13
- 101.11
- 77.48
- 77.16
- 76.84
- 55.84
- 47.46
- 42.79
- 21.63

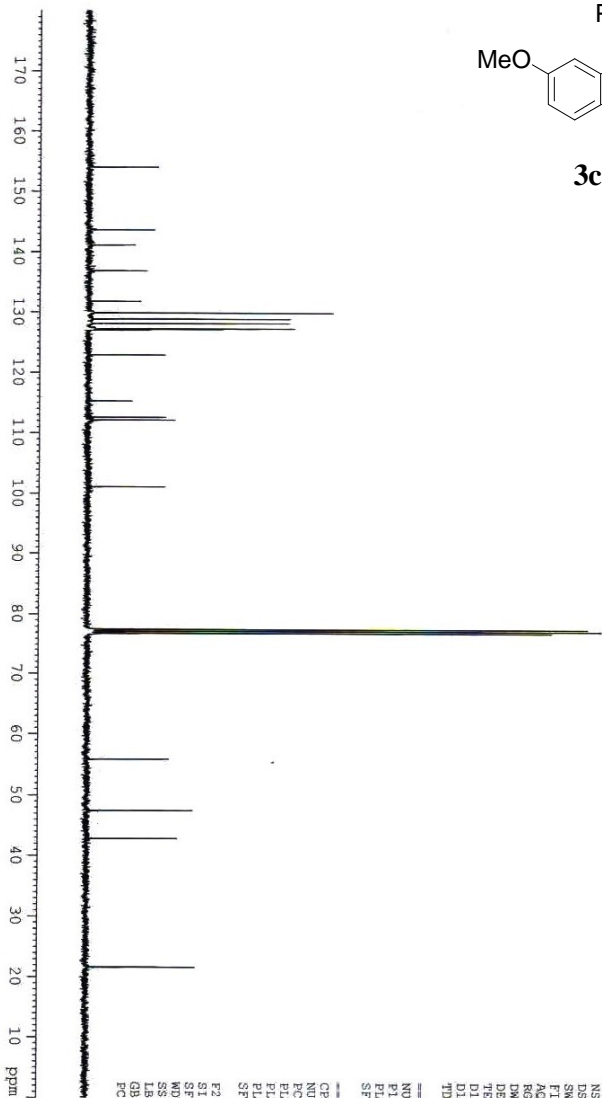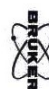

Current Data Parameters  
 NAME Dr. A HAMRA 2014  
 EXNO 1350  
 PROCNO 1

F2 - Acquisition Parameters

Date 20150105  
 Time 18.29  
 INSTRUM spect  
 PROBHD 5 mm EBBBO BBI  
 PULPROG zgpg30  
 TD 65536  
 SOLVENT CDCl3  
 NS 512  
 DS 2  
 SWH 24038.461 Hz  
 FIDRES 0.112296 Hz  
 AQ 0.671296 sec  
 RG 40.87  
 DW 20.800 usec  
 DE 6.50 usec  
 TE 297.5 K  
 D1 2.0000000 sec  
 D11 0.0300000 sec  
 PD0 1

CHANNEL F1  
 NUC1 13C  
 P1 8.90 usec  
 PL1 54.0000000 W  
 SFO1 100.628386 MHz

CHANNEL F2  
 NUC2 1H  
 P2 13.0000000 usec  
 PL2 0.4000000 W  
 PLM1 0.40782995 W  
 PLM3 0.26107001 W  
 SFO2 400.1516006 MHz

E2 - Processing parameters  
 SI 16384  
 SF 100.617188 MHz  
 MDW 8M  
 SSB 0  
 LB 1.00 Hz  
 GB 0  
 PC 1.40

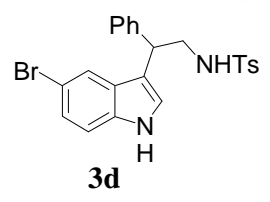

- 8.167
- 7.578
- 7.557
- 7.213
- 7.191
- 7.186
- 7.180
- 7.167
- 7.152
- 7.134
- 7.125
- 7.066
- 7.049
- 6.941

- 4.444
- 4.135
- 4.116
- 4.097
- 3.529
- 3.512
- 3.497
- 3.477
- 3.459
- 3.441
- 3.426
- 3.410

- 2.367

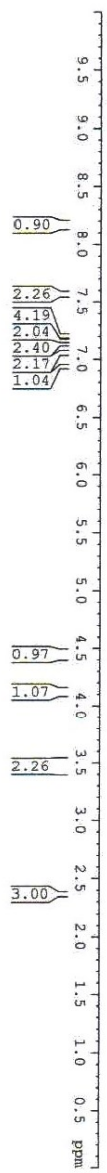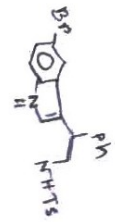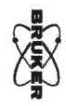

Current Data Parameters  
 NAME: Dr. A. HAJRA 2014  
 EXPRN: 1352  
 PROCNO: 1

F2 - Acquisition Parameters  
 Date\_ 20150106  
 Time 17.54  
 INSTRUM spect  
 PROBHD 5 mm PABBO BB/  
 PULPROG zg30  
 TD 32768  
 SOLVENT CDCl3  
 NS 32  
 DS 2  
 SWH 8223.685 Hz  
 FIDRES 0.250967 Hz  
 AQ 1.9923444 sec  
 RG 87.66  
 DW 60.800 usec  
 DE 6.50 usec  
 TE 296.3 K  
 D1 1.00000000 sec  
 I 1

===== CHANNEL f1 =====  
 NUC1 1H  
 P1 14.75 usec  
 P1M1 11.9946909 W  
 SFO1 400.1524711 MHz  
 F2 - Processing parameters  
 SI 16384  
 SF 400.1500408 MHz  
 WDW EM  
 SSB 0  
 GB 0  
 PC 1.00

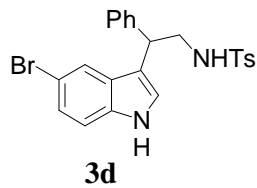

- 143.81
- 140.68
- 136.71
- 135.20
- 129.99
- 129.00
- 128.35
- 127.97
- 127.33
- 127.21
- 125.42
- 123.45
- 121.69
- 115.27
- 113.03
- 112.91

- 77.48
- 77.16
- 76.84

- 47.53
- 42.43

- 21.74

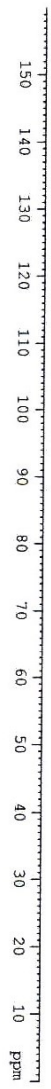

Current Data Parameters  
 NAME Dr. A HANRA 2014  
 EXPNO 1353  
 PROCNO 1

F2 - Acquisition Parameters  
 Date\_ 20111023  
 Time 19:03  
 INSTRUM spect  
 PROBRD 5 mm PABBO BB/  
 PULPROG zgpg30  
 TD 32768  
 SFO100.6278588 MHz  
 NS 32768  
 DS 2  
 SWH 24038.461 Hz  
 FIDRES 0.733596 Hz  
 AQ 0.6816294 sec  
 SFO2 100.6278588 MHz  
 DQ 87.46 usec  
 DE 2.46 usec  
 TE 297.4 K  
 D1 2.00000000 sec  
 D11 0.03000000 sec  
 D12 1

===== CHANNEL f1 =====  
 NUCL1 13C  
 P1 8.90 usec  
 PL1 54.0000000 W  
 SFO1 100.6278588 MHz

===== CHANNEL f2 =====  
 CPDPRG2 waltz16  
 NUCL2 1H  
 P2 12.0000000 usec  
 PL2 0.0000000 W  
 SFO2 400.26107001 MHz

===== Processing parameters =====  
 SI 16384  
 SF 100.617768 MHz  
 WDM EM  
 SSB 0  
 LB 1.00 Hz  
 GB 0  
 PC 1.40

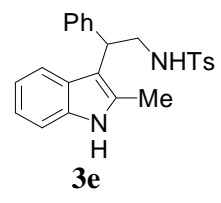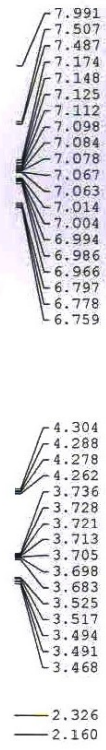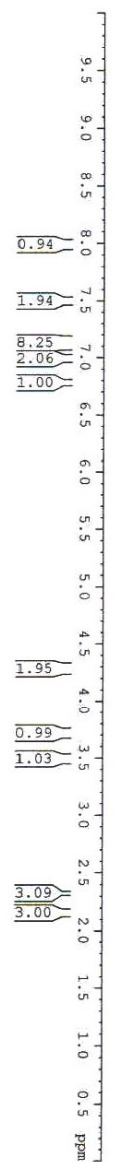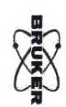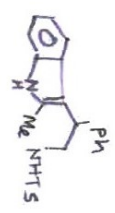

Current Data Parameters  
 NAME Dr. A HAJRA 2014  
 EXPNO 1357  
 PROCNO 1

F2 - Acquisition Parameters  
 Date\_ 20150109  
 Time 16.37  
 INSTRUM spect  
 PROBRD 5 mm PABBO BB/  
 PULPROG zg30  
 TD 32768  
 SOLVENT CDCl3  
 NS 24  
 DS 2  
 SRH 8223.687 Hz  
 FIDRES 0.250967 Hz  
 AQ 1.9923444 sec  
 RG 40.87  
 DW 60.800 usec  
 DE 6.50 usec  
 TE 296.7 K  
 D1 1.00000000 sec  
 TDO 1

===== CHANNEL f1 =====  
 NUC1 1H  
 P1 14.75 usec  
 PLW1 11.9949989 W  
 SFO1 400.1524711 MHz

F2 - Processing parameters  
 SI 16384  
 SF 400.1500526 MHz  
 WDW EM  
 SSB 0  
 LB 0.30 Hz  
 GB 0  
 PC 1.00



1H of VENC-197

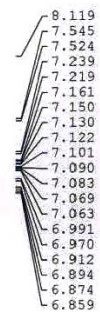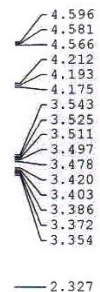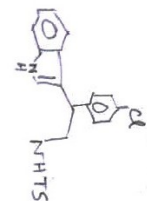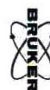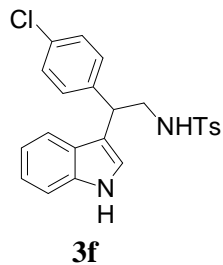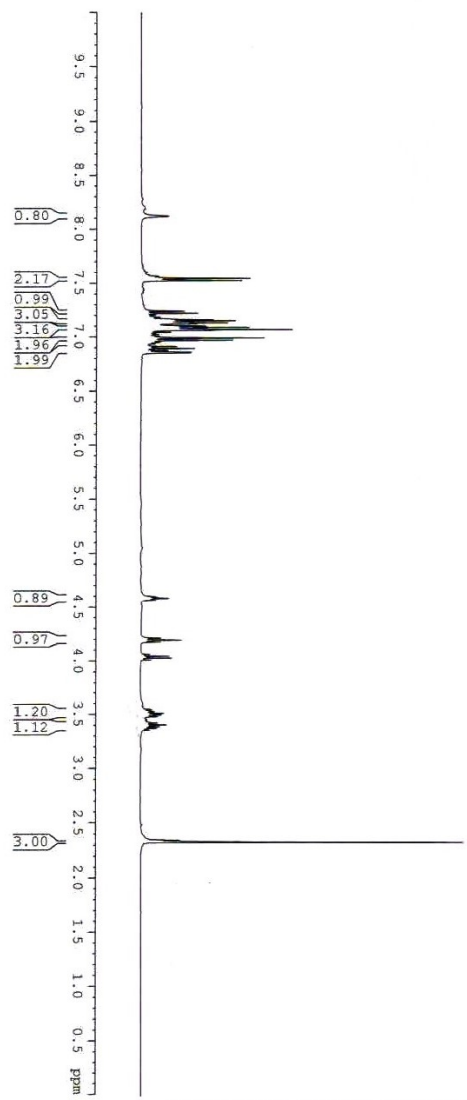

Current Data Parameters  
 NAME Dr. A MAIER  
 EXNO 1051  
 PROCNO 1

F2 - Acquisition Parameters  
 Date\_ 20150301  
 Time 16.15  
 INSTRUM spect  
 PROBRD 5 mm PABBO BB/  
 PULPROG zg30  
 SOLVENT CDCl3  
 NS 24  
 DS 2  
 SWH 8223.685 Hz  
 FIDRES 0.250967 Hz  
 AQ 1.9923444 sec  
 RG 54.07  
 DW 60.800 usec  
 DE 8.50 usec  
 TE 297.0 K  
 TD 1.00000000 sec

===== CHANNEL f1 =====  
 NUC1 1H  
 P1 14.75 usec  
 PLW1 11.9949989 W  
 SF01 400.1524711 MHz

F2 - Processing parameters  
 SI 16394  
 SMW 400.1500482 MHz  
 SSB EN  
 LB 0  
 GB 0  
 PC 1.00



- 143.68
- 139.83
- 136.70
- 136.63
- 132.75
- 129.86
- 129.43
- 128.87
- 127.13
- 126.39
- 122.56
- 122.19
- 119.78
- 119.11
- 115.06
- 111.53

- 77.48
- 77.16
- 76.84

- 47.42
- 42.24

- 21.65

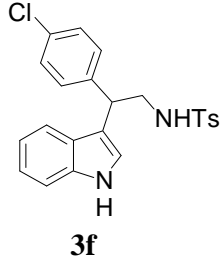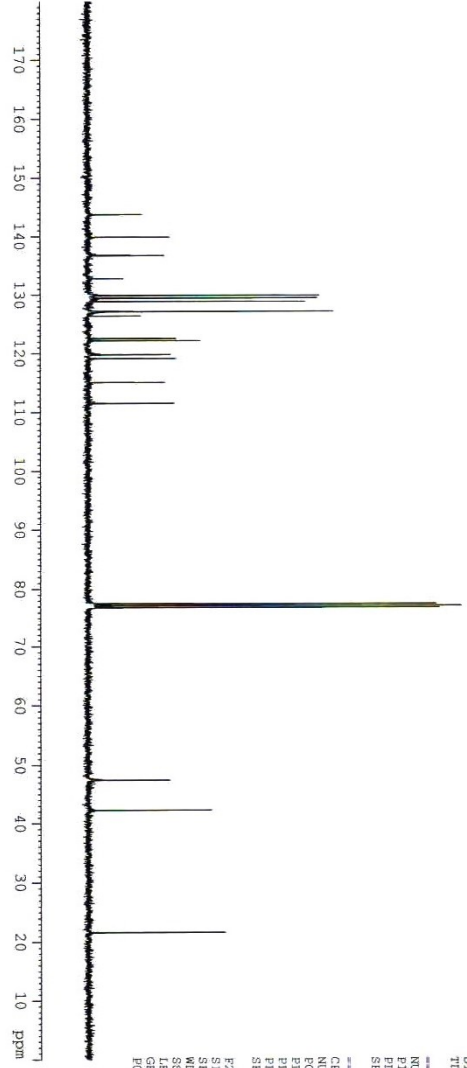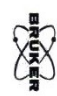

Current Data Parameters  
 NAME: DF\_A VALPS  
 EXTNO: 1052  
 F2 (NO) 1

F2 - Acquisition Parameters  
 Date\_: 20150301  
 Time: 16.32  
 INSTRUM: spect  
 PPROBHD: 5 mm PABBO BB/  
 PULPROG: zgpg30  
 TD: 32768  
 SOLVENT: CDCl3  
 NS: 274  
 DS: 4  
 SWH: 24038.461 Hz  
 FIDRES: 0.733596 Hz  
 AQ: 0.6916244 sec  
 RG: 54.07  
 DW: 20.800 usec  
 DE: 2.000 usec  
 TE: 297.9 K  
 D1: 2.00000000 sec  
 D11: 0.03000000 sec  
 TDO: 1

CHANNEL F1  
 NUCL1: 13C  
 P1: 8.90 usec  
 PLM1: 54.00000000 W  
 SFO1: 100.6278588 MHz

CHANNEL F2  
 walz16  
 NUCL2: 1H  
 ECHD2: 80.00 usec  
 PLM2: 12.00000000 W  
 SFO2: 400.1516006 MHz

F2 - Processing parameters  
 SI: 16384  
 SF: 100.617858 MHz  
 WDM: EM  
 SSB: 0  
 LB: 1.00 Hz  
 GB: 0  
 EC: 1.40

1H of VBNC-175

- 8.177
- 7.389
- 7.368
- 7.279
- 7.259
- 7.199
- 7.179
- 7.171
- 7.078
- 7.058
- 7.023
- 6.978
- 6.973
- 6.931
- 6.929
- 6.912
- 6.894
- 6.892
  
- 4.821
- 4.804
  
- 4.338
- 4.315
- 3.938
- 3.697
- 3.688
- 3.668
- 3.659
- 3.554
- 3.543
- 3.525
- 3.514
  
- 2.324
  
- 1.993

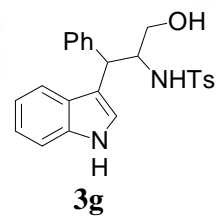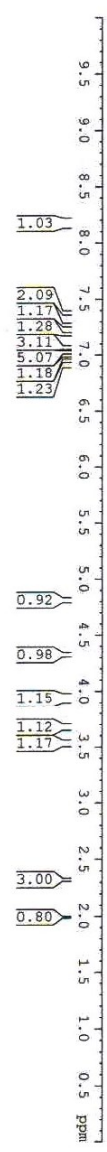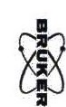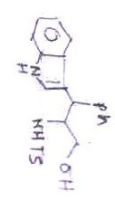

Current Data Parameters  
 NAME DL. A HARV 2014  
 EXPNO 1361  
 PROCNO 1

F2 - Acquisition Parameters  
 Date\_ 20150110  
 Time\_ 18.04  
 INSTRUM spect  
 PROBD 5 mm PABBO BB/  
 PULPROG zg30  
 TD 32768  
 SOLVENT CDCl3  
 NS 24  
 DS 2  
 SWH 8223.685 Hz  
 FIDRES 0.250967 Hz  
 AQ 1.992344 sec  
 RG 40.87  
 KM 60.87  
 DM 6.90 usec  
 DE 296.7 K  
 TE 1.00000000 sec  
 TD0 1

CHANNEL f1  
 NUC1 1H  
 P1 14.75 usec  
 PL1 11.99499989 W  
 SFO1 400.1524711 MHz

F2 - Processing parameters  
 SI 16384  
 SF 400.1500440 MHz  
 WDW EM  
 SSB 0  
 LB 0.30 Hz  
 GB 0  
 PC 1.00

- 143.51
- 140.51
- 136.69
- 136.27
- 129.74
- 128.81
- 128.48
- 127.20
- 126.89
- 126.77
- 122.35
- 122.25
- 119.69
- 119.05
- 115.41
- 111.41

- 77.48
- 77.16
- 76.84

- 63.56
- 58.93

- 43.94

- 21.65

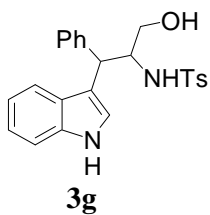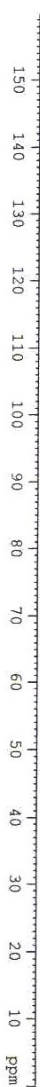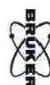

Current Data Parameters  
 NAME Dr. A RAJVA 2014  
 EXPNO 1362  
 PROCNO 1

F2 - Acquisition Parameters

Date\_ 20150110  
 Time 18.31  
 INSTRUM spect  
 P2NAME 5 mm BBAU-CP  
 PULPROG zgpg30  
 TD 32768  
 SOLVENT CDCl3  
 NS 205  
 DS 2  
 SFO 24038.464 Hz  
 FIDRES 0.731566 Hz  
 AQ 40.87 sec  
 RG 64  
 DE 20.800 usec  
 DM 6.50 usec  
 DI 2.0000000 sec  
 D11 0.03000000 sec  
 TD0 1

===== CHANNEL f1 =====  
 NUC1 13C  
 P1 8.13 usec  
 PLM1 54.00000000 W  
 SFO1 100.6278588 MHz

===== CHANNEL f2 =====  
 CPDPRG2 waltz16  
 VFO2 125.760353 MHz  
 FCWD2 80.00 usec  
 PLM2 12.00000000 W  
 PLM12 0.407929399 W  
 PLM13 0.26107001 W  
 SFO2 400.1516006 MHz

F2 - Processing parameters

SI 16384  
 SF 100.6177889 MHz  
 WDW 0  
 SSB 0  
 GB 0  
 PC 1.40

1H of VBNC-177

- 7.401
- 7.380
- 7.296
- 7.276
- 7.163
- 7.146
- 7.126
- 7.093
- 7.081
- 7.073
- 7.033
- 6.937
- 6.935
- 6.918
- 6.900
- 6.898
- 6.824

4.812

- 4.336
- 4.313
- 3.919
- 3.713
- 3.704
- 3.684
- 3.675
- 3.588
- 3.574
- 3.557
- 3.545

2.336

1.990

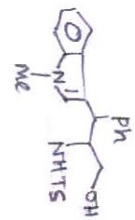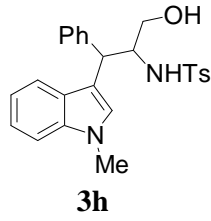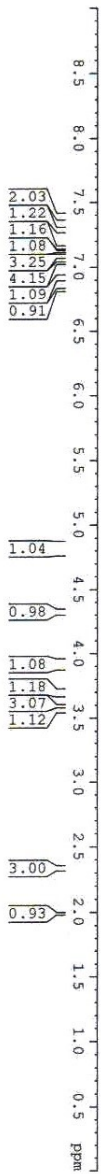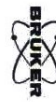

Current Data Parameters  
 NAME Dr. A. RAJRA 2014  
 EXPNO 1370  
 PROCNO 1

F2 - Acquisition Parameters  
 Date\_ 20150111  
 Time\_ 17.05  
 INSTRUM spect  
 PROBHD 5 mm PABBO BB/  
 PULPROG zg30  
 TD 32768  
 SOLVENT CDCl3  
 NS 24  
 DS 2  
 SWH 8223.685 Hz  
 FIDRES 0.290967 Hz  
 AQ 1.9923444 sec  
 RG 40.87  
 DW 60.800 usec  
 DE 6.50 usec  
 TE 296.8 K  
 D1 1.00000000 sec  
 TDO 1

CHANNEL f1  
 NUC1 1H  
 P1 14.75 usec  
 PLW1 11.99499989 W  
 SFO1 400.1524711 MHz  
 F2 - Processing parameters  
 SI 16384  
 SF 400.1500475 MHz  
 WDW EM  
 SSB 0  
 LB 0.30 Hz  
 GB 0  
 PC 1.00

- 143.44
- 140.66
- 136.98
- 136.74
- 129.70
- 128.80
- 128.43
- 127.23
- 127.11
- 126.84
- 126.81
- 121.97
- 119.27
- 119.16
- 114.01
- 109.38

- 77.48
- 77.16
- 76.84

- 63.60
- 59.02

- 43.90

- 32.83

- 21.66

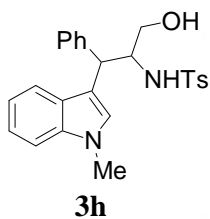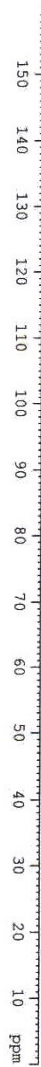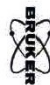

Current Data Parameters  
 NAME Dr. A. HAJRA, 2014  
 EXPNO 1371  
 PROCNO 1

F2 - Acquisition Parameters  
 Date\_ 20150117  
 Time 17:29

INSTRUM spect  
 PROBRD 5 mm BBO BB/  
 PULPROG zgpg30

TD 65536  
 SFO130  
 SOLVENT CDCl3

NS 400  
 DS 2

SWH 24038.461 Hz  
 FIDRES 0.643298 Hz

AQ 0.643298 Hz  
 RG 40.87

DE 20.800 usec  
 TE 297.7 K

DE 6.50 usec  
 D11 2.0000000 sec

D1 0.0300000 sec  
 TD0 1

CH01 CHANNEL f1  
 NU1 8 3C  
 PL1 14 13C  
 P1M1 54.0000000 W  
 SFO1 100.6278588 MHz

CH02 CHANNEL f2  
 NUC2 14 1H  
 P1M2 80.00 usec  
 SFO2 500.1364540 MHz

F2 - Processing Parameters  
 SI 16384  
 SF 100.6177909 MHz  
 WDM EM  
 LB 0 1.00 Hz  
 GB 0  
 PC 1.40

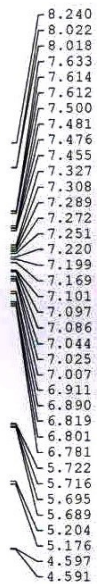

2.130

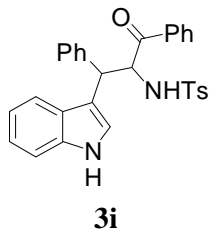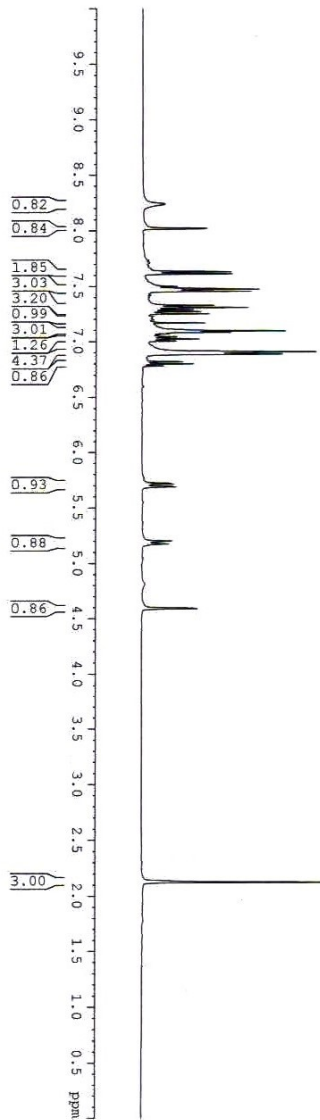

Current Data Parameters  
NAME Dr. A.MA:BE  
EXPNO 1034  
PROCNO 1

F2 - Acquisition Parameters  
Date\_ 20150116  
Time 16.07  
INSTRUM spect  
PROBHD 5 mm PABBO  
PULPROG zgpg30  
TD 32768  
SOLVENT CDCl3  
NS 32  
DS 2  
SWH 8223.685 Hz  
FIDRES 0.250967 Hz  
AQ 1.9923444 sec  
RG 57.28  
DW 60.800 usec  
DE 6.50 usec  
TE 293.7 K  
D1 1.00000000 sec  
TD0 1

CHANNEL f1  
NUC1 1H  
PI 14.75 usec  
PL1 11.9949989 W  
SFO1 400.1524711 MHz

F2 - Processing parameters  
SI 16384  
SF 400.1500450 MHz  
WDW EM  
SSB 0  
LB 0  
GB 0  
PC 1.00

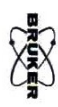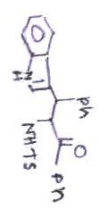

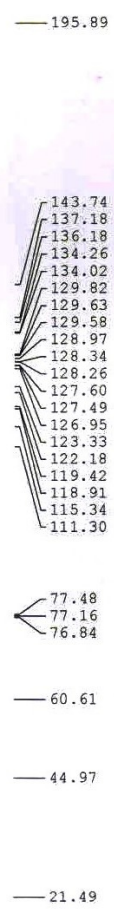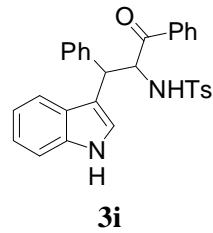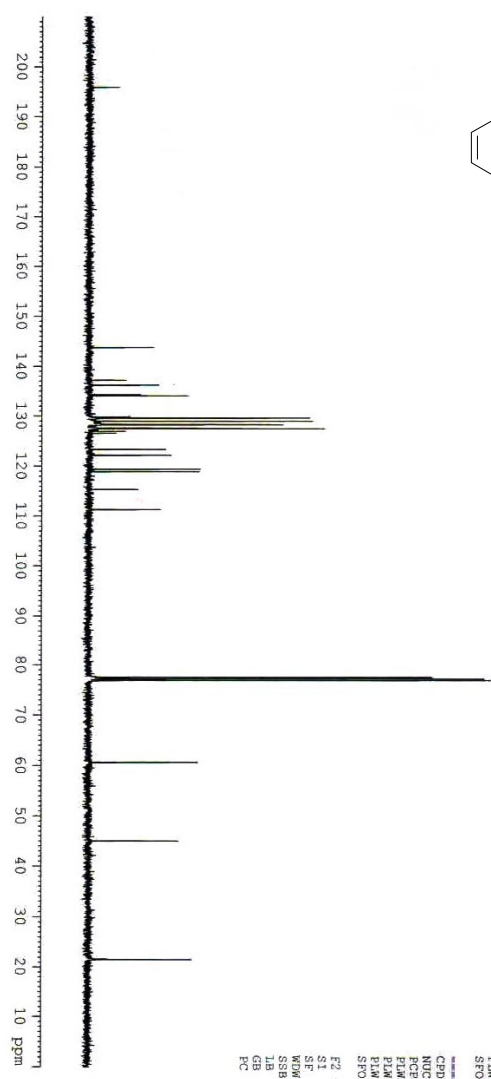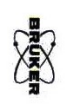

Current Data Parameters  
 NAME VBNC-180  
 EXPNO 2  
 PROCNO 1035  
 1035  
 1

F2 - Acquisition Parameters  
 Date\_ 20151116  
 Time 14:17  
 INSTRUM spect  
 PROBRD 5 mm PABBO BB/  
 PULPROG zgpg30  
 TD 32768  
 SFO 400  
 NS 400  
 DS 2  
 SWH 24038.461 Hz  
 FIDRES 0.733596 Hz  
 AQ 0.6814234 sec  
 RG 327.68  
 DW 20.800 usec  
 DE 6.50 usec  
 TE 294.5 K  
 D1 2.0000000 sec  
 D11 0.0300000 sec  
 TDD 1

===== CHANNEL f1 =====  
 NUC1 13C  
 P1 8.00 usec  
 PL1 54.0000000 W  
 SFO1 100.6278588 MHz

===== CHANNEL f2 =====  
 NUC2 13C  
 P2 80.00 usec  
 PL2 12.00000000 W  
 PLM1 0.40792999 W  
 PLM3 0.26107001 W  
 SFO2 400.1516006 MHz

F2 - Processing parameters  
 SI 16384  
 SF 100.6177890 MHz  
 WDW EM  
 SSB 0  
 LB 1.00 Hz  
 GB 0  
 PC 1.40

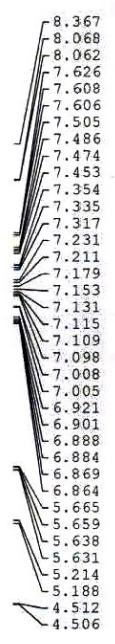

2.134

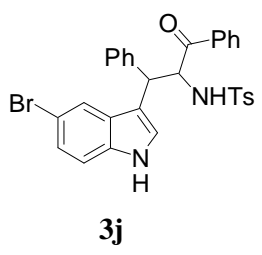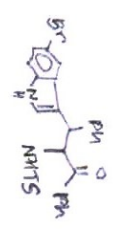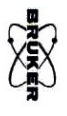

Current Data Parameters  
 NAME Dr. A MAJEE  
 EXPNO 1036  
 PROCNO 1

F2 - Acquisition Parameters  
 Date\_ 20150119  
 Time\_ 17.16  
 INSTRUM spect  
 PROBHD 5 mm PABBO BB/  
 PULPROG zg30  
 TD 32768  
 SOLVENT CDCl3  
 NS 32  
 DS 2  
 SWH 8223.685 Hz  
 FIDRES 0.250867 Hz  
 AQ 1.9923444 sec  
 RG 62.69  
 DW 60.800 usec  
 DE 6.50 usec  
 TE 296.3 K  
 D1 1.00000000 sec  
 TD0 1

CHANNEL F1  
 NUC1 1H  
 P1 14.75 usec  
 PL1 11.9949989 W  
 SFO1 400.1524711 MHZ

F2 - Processing parameters  
 SI 16384  
 SF 400.1500409 MHZ  
 MDW EM  
 SSB 0  
 IB 0  
 GB 0  
 PC 1.00

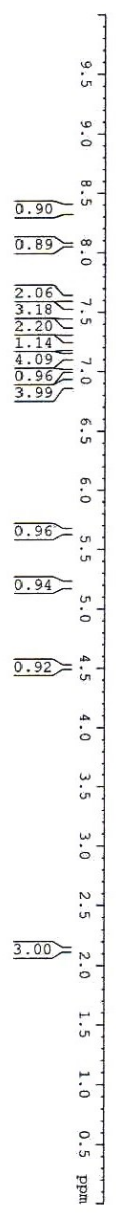



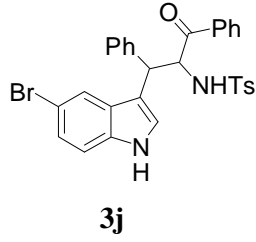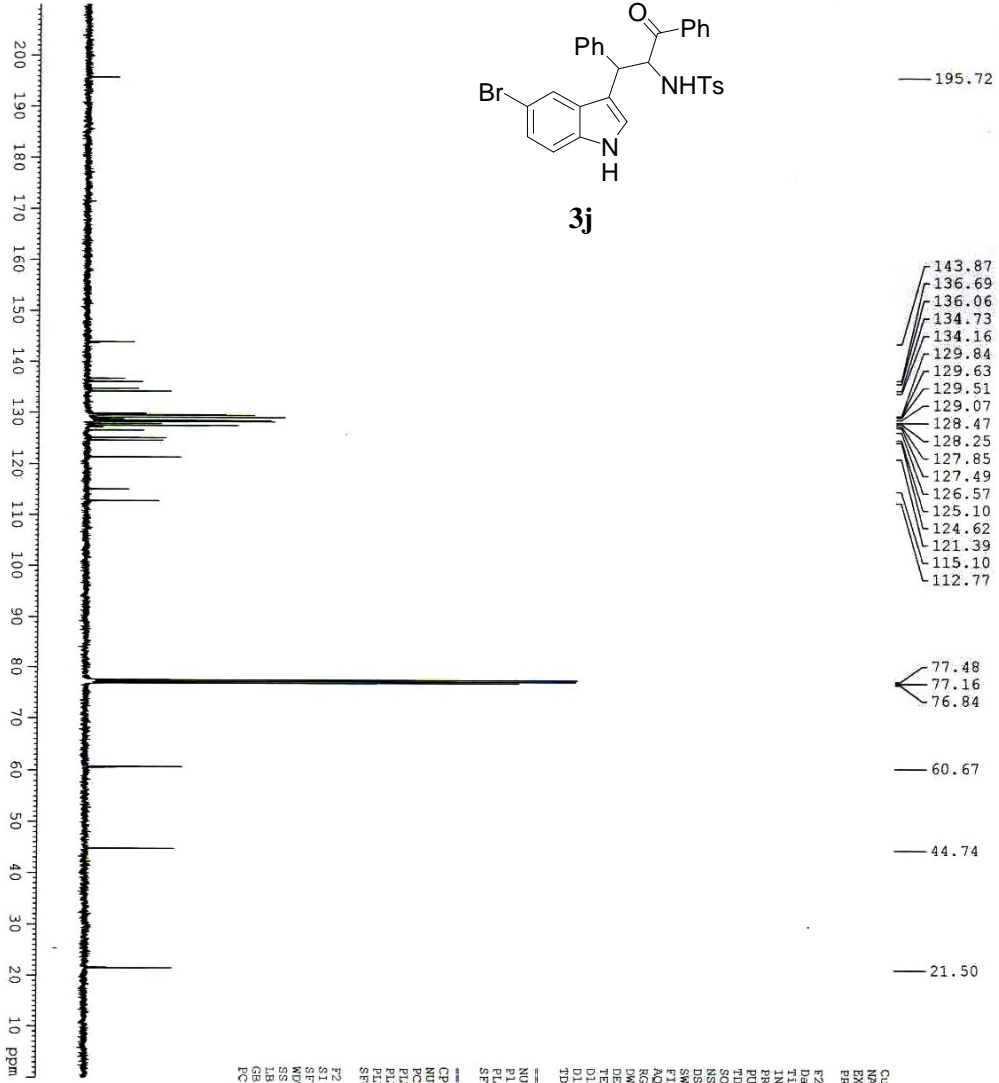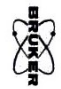

Current Data Parameters  
 NAME Dr. A.VAJEE  
 EXPNO 1037  
 PROCNO 1

F2 - Acquisition Parameters  
 Date\_ 20150119  
 Time 17.43  
 INSTRUM spect  
 PROBD 5 mm PABBO BB/  
 PULPROG zgpg30  
 TD 65536  
 SOLVENT CDCl3  
 NS 512  
 DS 2  
 SWH 24038.461 Hz  
 FIDRES 0.73296 Hz  
 AQ 0.66224 sec  
 RG 62.49  
 BW 20.800 ussec  
 DE 6.50 ussec  
 TE 297.5 K  
 D1 2.0000000 sec  
 TDO 0.0300000 sec  
 TD0 1

CHANNEL F1  
 NUCL1 13C  
 P1 8.90 ussec  
 PL1 54.000000 M  
 SFO1 100.6278585 MHz

CHANNEL F2  
 CPDPRG2 waltz16  
 NUCL2 1H  
 P2 80.10 ussec  
 PLW2 12.0000000 M  
 PLM12 0.40782999 W  
 PLM13 0.26107001 W  
 SFO2 400.1516006 MHz

F2 - Processing parameters  
 SI 32768  
 SF 100.6177865 MHz  
 KW 0 EM  
 SSB 0  
 IB 1.00 Hz  
 SC 0  
 LC 1.40

1H OF VBNC-179

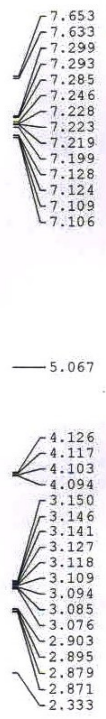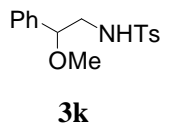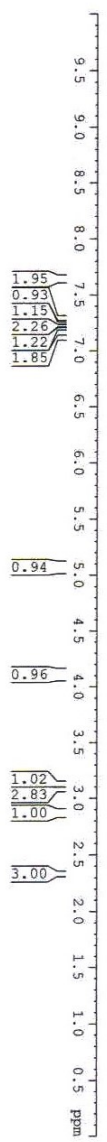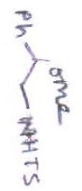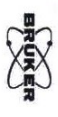

Current Data Parameters  
 NAME Dr. A VAJEE  
 EXPNO 1033  
 PROCNO 1

F2 - Acquisition Parameters  
 Date\_ 20150115  
 Time 17.31  
 INSTRUM spect  
 PROBHD 5 mm PABBO BB/  
 PULPROG zg30  
 TD 32768  
 SOLVENT CDCl3  
 NS 24  
 DS 2  
 SM 8223.682 Hz  
 FIDRES 0.241967 Hz  
 AQ 1.9923444 sec  
 RG 37.83  
 DW 60.800 usec  
 DE 6.50 usec  
 TE 292.6 K  
 D1 1.00000000 sec  
 TDO 1

==== CHANNEL f1 =====  
 NUCL 1H  
 P1 14.75 usec  
 PLWI 11.99499989 W  
 SFO1 400.1524711 MHz

F2 - Processing parameters  
 SI 16384  
 SF 400.1500423 MHz  
 WDW EM  
 SSB 0  
 GB 0  
 PC 1.00

143.56  
138.37  
137.05  
129.85  
128.79  
128.53  
127.18  
126.74

82.13  
77.48  
77.16  
76.84

56.88  
49.44

21.63

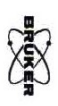

Current Data Parameters  
NAME: Dr. A MAJEE  
EXPNO: 1040  
PROCNO: 1

F2 - Acquisition Parameters  
Date\_ : 20150120  
Time : 17.49

INSTRUM : spect  
PROBHD : 5 mm EBBBO BB/  
PULPROG : zgpg30  
TD : 262144  
SOLVENT : CDCl3  
NS : 54  
DS : 2  
SWH : 24038.461 Hz  
FIDRES : 0.132946 Hz  
AQ : 0.732244 sec  
RG : 186.42  
DW : 20.800 usec  
DE : 6.50 usec  
TE : 296.9 K  
D1 : 2.0000000 sec  
D11 : 0.3500000 sec  
TD0 : 1

CHANNEL F1  
NUC1 : 13C  
P1 : 8.30 usec  
PL1 : 54.000000 MHz  
SFO1 : 100.6272588 MHz

CHANNEL F2  
NAME: maltz16  
NUC2 : 1H  
P2 : 80.00 usec  
PL2 : 12.0000000 MHz  
PLM2 : 0.40792999 W  
PLM13 : 0.26107001 W  
SFO2 : 400.1516006 MHz

F2 - Processing parameters  
SI : 32768  
SF : 100.6177880 MHz  
WDW : EM  
SSB : 0  
LB : 1.00 Hz  
GB : 0  
EC : 1.40

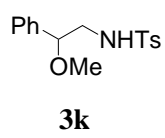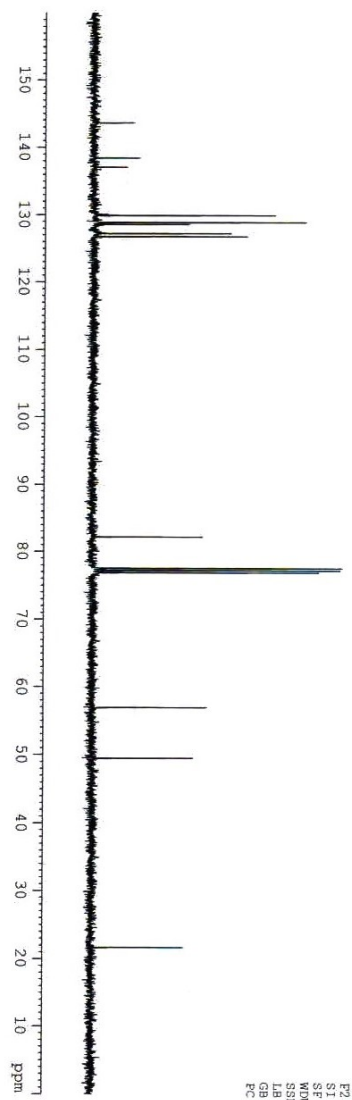

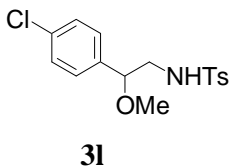

- 7.734
- 7.713
- 7.325
- 7.304
- 7.282
- 7.170
- 7.166
- 7.153
- 7.149
  
- 5.014
- 4.992
  
- 4.224
- 4.215
- 4.202
- 4.192
- 3.234
- 3.225
- 3.212
- 3.202
- 3.192
- 3.184
- 2.971
- 2.963
- 2.949
- 2.940
- 2.930
- 2.916
- 2.908
- 2.444

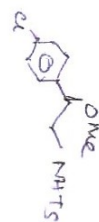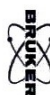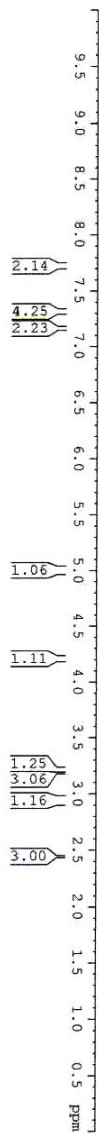

Current Data Parameters  
 NAME Dr. A. MATJE  
 EXPNO 1047  
 PROCNO 1

F2 - Acquisition Parameters  
 Date\_ 20150224  
 Time 16.34  
 INSTRUM spect  
 PROBHD 5 mm PABBO BB/  
 PULPROG zg30  
 TD 32768  
 SOLVENT CDCl3  
 NS 32  
 DS 2  
 SFO1 8233.685 Hz  
 FIDRES 0.7250967 Hz  
 AQ 1.9923444 sec  
 RG 87.66  
 DW 60.800 usec  
 DE 6.50 usec  
 TE 295.6 K  
 D1 1.00000000 sec  
 TDO 1

==== CHANNEL f1 =====  
 NUC1 1H  
 P1 14.75 usec  
 PL1 11.99499989 W  
 SFO1 400.1524711 MHz

F2 - Processing parameters  
 SI 16384  
 SF 400.1500000 MHz  
 SSF 0  
 SSB 0  
 LB 0  
 GB 0  
 PC 1.00

143.66  
137.02  
136.96  
134.34  
129.88  
129.02  
128.12  
127.16

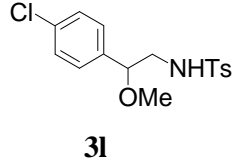

81.55  
77.48  
77.16  
76.84

56.99  
49.31

21.66

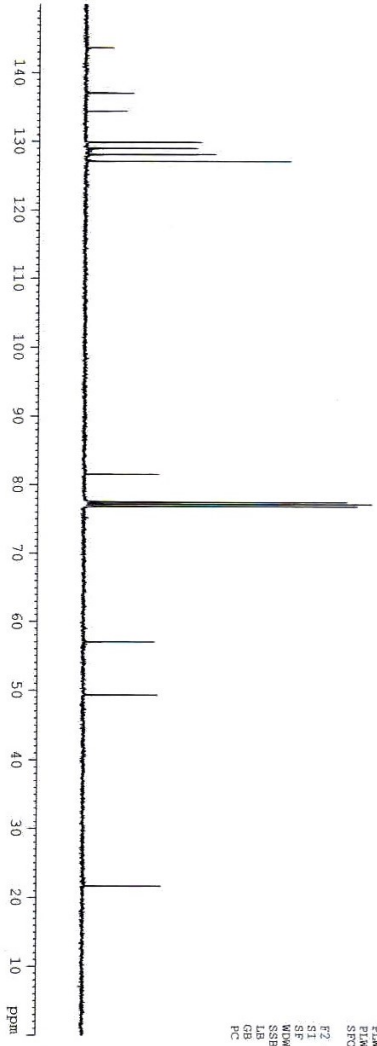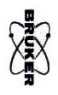

Current Data Parameters  
NAME Dr. A. MAUSE  
EXPTNO 1048  
PROCNO 1

F2 - Acquisition Parameters  
Date\_ 20150224  
Time 17.16  
INSTRUM spect  
PROBHD 5 mm PABBO BBO  
PULPROG zgpg30  
TD 32768  
SOLVENT CDCl3  
NS 512  
DS 2  
SSBH 24038.46 Hz  
FIDRES 0.733596 Hz  
AQ 0.6816244 sec  
RG 87.66  
SM 20.800 usec  
TM 1.00 usec  
TE 29.7  
D1 2.00000000 sec  
D11 0.03000000 sec  
TD0 1

===== CHANNEL f1 13C =====  
NUC1 13C  
P1 8.90 usec  
PL1 54.00000000 W  
SFO1 100.6273508 MHz

===== CHANNEL f2 =====  
CPDPRG2 waltz16  
NUC2 13C  
P2 80.0 usec  
PL2 12.00000000 W  
SFO2 100.6273508 MHz  
PLW12 0.40792999 W  
PLW13 0.26107001 W  
SFO2 400.1516006 MHz

F2 - Processing parameters  
SI 16384  
SF 100.617851 MHz  
WDW EM  
SSB 0  
GB 0  
PC 1.40

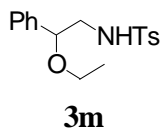

- 7.651
  - 7.631
  - 7.296
  - 7.289
  - 7.282
  - 7.234
  - 7.215
  - 7.210
  - 7.194
  - 7.133
  - 7.128
  - 7.113
- 
- 5.032
  - 5.010
  - 4.232
  - 4.223
  - 4.208
  - 4.199
  - 3.294
  - 3.289
  - 3.276
  - 3.271
  - 3.258
  - 3.253
  - 3.178
  - 3.160
  - 3.155
  - 3.148
  - 3.142
  - 3.138
  - 3.125
  - 3.116
  - 3.107
  - 3.092
  - 3.083
  - 2.902
  - 2.894
  - 2.878
  - 2.870
  - 2.862
  - 2.846
  - 2.838
  - 2.330
  - 1.064
  - 1.046
  - 1.029

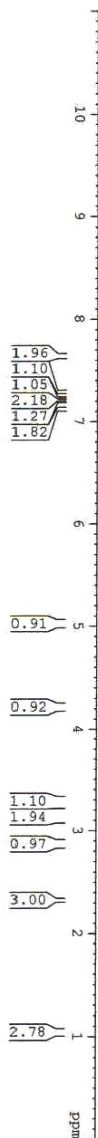

Current Data Parameters  
 NAME Dt. A H498  
 EXPNO 1038  
 PROCNO 1

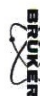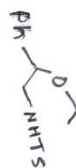

F2 - Acquisition Parameters  
 Date\_ 20150120  
 Time 16.24  
 INSTRUM spect  
 PROBHD 5 mm PABBO BB/  
 PULPROG zg30  
 TD 32768  
 SOLVENT CDCl3  
 NS 16  
 DS 2  
 SWH 8223.685 Hz  
 FIDRES 0.250967 Hz  
 AQ 1.9923444 sec  
 RG 37.83  
 DM 60.800 usec  
 DE 6.30 usec  
 TE 296.0 K  
 D1 1.00000000 sec  
 TDO 1

CHANNEL F1  
 NUC1 1H  
 P1 14.75 usec  
 PL1 11.9949989 W  
 SFO1 400.1524711 MHz

F2 - Processing parameters  
 SI 16384  
 SF 400.1500433 MHz  
 WDW EM  
 SSB 0  
 LB 0.30 Hz  
 GB 0  
 PC 1.00

143.51  
139.06  
137.10  
129.80  
128.69  
128.35  
127.15  
126.61

80.25  
77.48  
77.16  
76.85

64.50

49.45

21.59

15.23

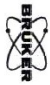

Current Data Parameters  
NAME Dr. A. MAJER  
EXNO 1039  
PROCNO 1

F2 - Acquisition Parameters  
Date\_ 20150120  
Time 16:44  
INSTRUM spect  
PROBHD 5 mm BBBO BH/  
PULPROG zgpg30  
TD 65536  
SOLVENT CDCl3  
NS 42  
DS 2  
SSB 24098.461 Hz  
SF 125.761 Hz  
AQ 0.6816244 sec  
RG 37.83  
DM 20.800 usec  
DE 6.50 usec  
TE 29.2  
D1 2.0000000 sec  
D11 0.0300000 sec  
TD0 1

===== CHANNEL f1 =====  
NUC1 13C  
PI 8.90 usec  
PLM1 54.00000000 W  
SFO1 100.6278988 MHz

===== CHANNEL f2 =====  
CDDPRG2 Waltz16  
NUC2 1H  
PCPD2 80.00 usec  
PLM2 12.00000000 W  
PLM3 0.40122993 W  
PLM4 0.40122993 W  
SFO2 400.1516006 MHz

F2 - Processing parameters  
SI 16384  
SF 100.617924 MHz  
WDW EM  
SSB 0  
LB 1.00 Hz  
GB 0  
PC 1.40

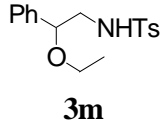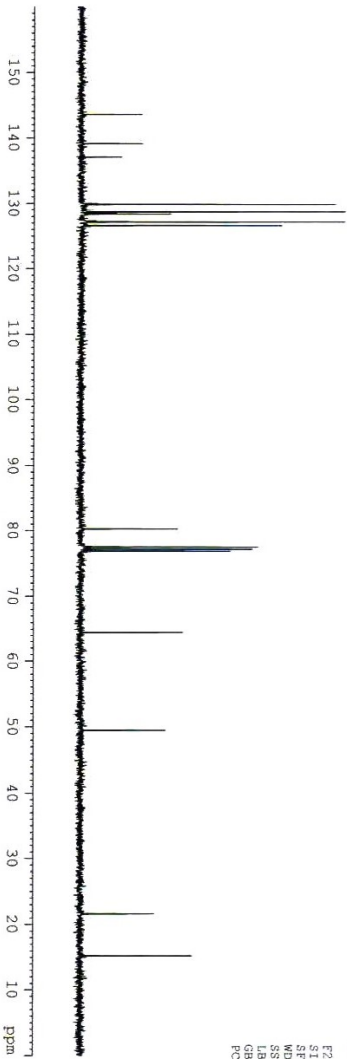

7.639  
7.618  
7.254  
7.220  
7.210  
7.200  
7.189  
7.077  
7.056

4.984  
4.963  
4.229  
4.220  
4.207  
4.197  
3.278  
3.273  
3.261  
3.255  
3.238  
3.188  
3.171  
3.165  
3.153  
3.148  
3.134  
3.124  
3.111  
3.101  
3.092  
3.078  
3.069  
2.876  
2.868  
2.854  
2.845  
2.835  
2.821  
2.813  
2.345  
1.068  
1.051  
1.033

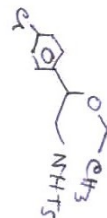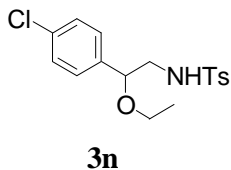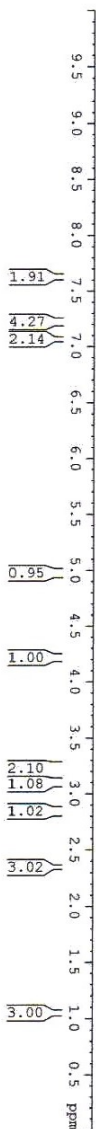

Current Data Parameters  
NAME Dr. A MAJER  
EXPNO 1049  
PROCNO 1

F2 - Acquisition Parameters  
Date\_ 20150227  
Time 16.32  
INSTRUM spect  
PROBHD 5 mm PABBO BB/  
PULPROG zgpg30  
TD 32768  
SOLVENT CDCl3  
NS 24  
DS 2  
SWH 8223.685 Hz  
FIDRES 0.250967 Hz  
AQ 1.9923444 sec  
RG 47.25  
DW 60.800 usec  
DE 6.50 usec  
TE 296.6 K  
D1 1.00000000 sec  
TD0 1

CHANNEL f1  
NUC1 1H  
P1 14.75 usec  
PL1 11.9949989 W  
SFO1 400.1524711 MHz

F2 - Processing parameters  
SI 16384  
SF 400.1500378 MHz  
WDW EM  
SSB 0  
LB 0  
GB 0  
PC 1.00

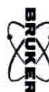



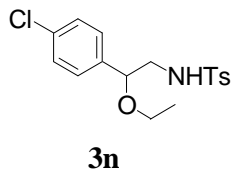

143.61  
137.67  
137.03  
134.11  
129.84  
128.91  
128.01  
127.13

79.67  
77.48  
77.16  
76.85

64.69

49.32

21.63

15.23

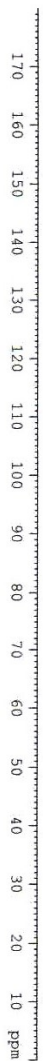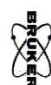

Current Data Parameters  
NAME VBNC-195  
EXPNO 1050  
PROCNO 1

F2 - Acquisition Parameters  
Date\_ 20130221  
Time 13:22:11  
INSTRUM spect  
PROBHD 5 mm PABO BB/  
PULPROG zgpg30  
TD 32768  
SFO1 125.13  
SOLVENT CDCl3  
NS 136  
DS 2  
SWH 24038.461 Hz  
FIDRES 0.733596 Hz  
AQ 0.681624 sec  
RG 327.5  
IM 20.800 usec  
DE 6.50 usec  
TE 297.4 K  
D1 2.0000000 sec  
D11 0.0300000 sec  
TD0 1

===== CHANNEL f1 =====  
NUC1 13C  
P1 13.00 usec  
PL1 0.00 dB  
SFO1 100.627888 MHz

===== CHANNEL f2 =====  
CPDPRG2 waltz16  
NUC2 13C  
PCPD2 80.00 usec  
PLM2 12.0000000 W  
PLM12 0.40792999 W  
PLM13 0.26107001 W  
SFO2 400.1516006 MHz

F2 - Processing parameters  
SI 16384  
SF 100.6177880 MHz  
WDW EM  
SSB 0  
GB 1.00 Hz  
PC 1.40

1H OF VBNC-187

7.650  
7.630  
7.231  
7.224  
7.214  
7.203  
7.178  
7.156  
7.150  
7.136  
7.132

5.651  
5.635  
5.620  
5.176

3.242  
3.226  
3.211

2.342

1.938

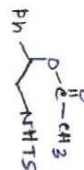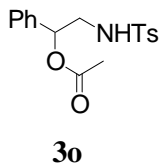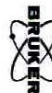

Current Data Parameters  
NAME Dr. A MAJEE  
EXPNO 1043  
PROCNO 1

F2 - Acquisition Parameters

Date\_ 20150207  
Time 15.43  
INSTRUM spect  
PROBHD 5 mm PABBO BB/  
PULPROG zg30  
TD 32768  
SOLVENT CDCl3  
NS 24  
DS 2  
SWH 8223.685 Hz  
FIDRES 0.230967 Hz  
AQ 1.9923444 sec  
RG 47.85  
DS 60.80 usec  
DE 28.0 K  
TE 1.00000000 sec  
TD0 1

CHANNEL f1

NUC1 1H  
P1 14.75 usec  
PLW1 11.9949989 W  
SFO1 400.1524711 MHz

F2 - Processing parameters

SI 16384  
SF 400.1500411 MHz  
WDW EM  
SSB 0  
LB 0.30 Hz  
GB 0  
PC 1.00

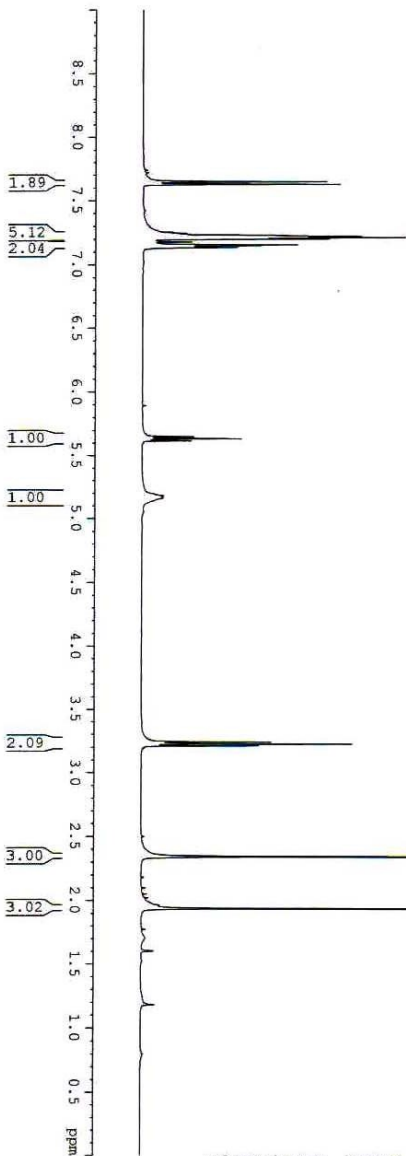

- 170.17
- 143.70
- 137.19
- 137.02
- 129.90
- 128.80
- 128.69
- 127.11
- 126.48
- 77.48
- 77.16
- 76.84
- 74.27
- 47.80
- 21.62
- 21.08

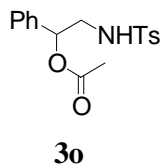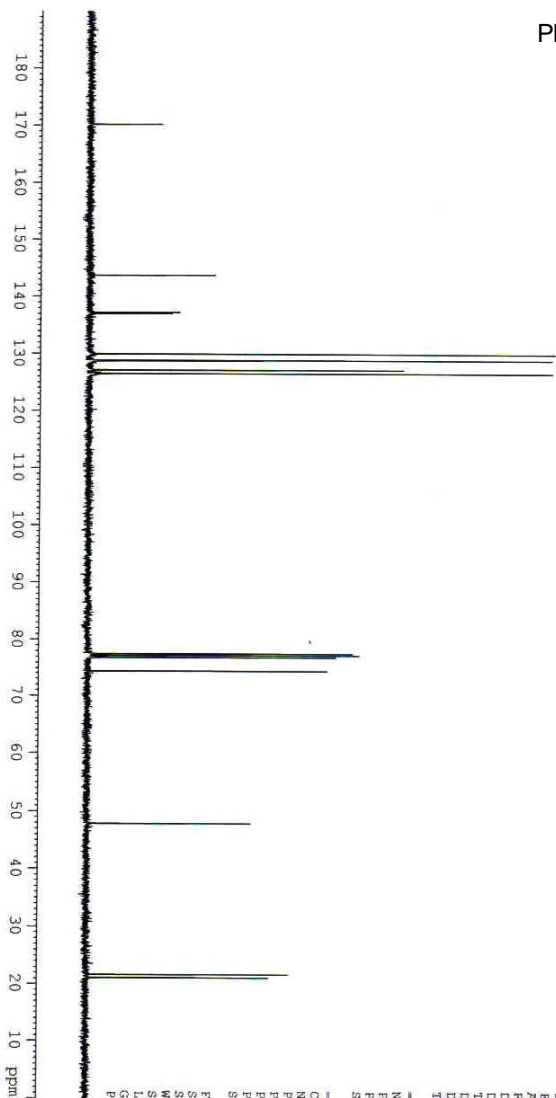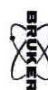

Current Data Parameters  
 NAME: Dr. A MAYEE  
 EXPNO: 1044  
 F2PROCNO: 1

F2 - Acquisition Parameters  
 Date\_ 20150207  
 Time 15.56  
 INSTRUM spect  
 PULPROG zgpg30  
 F2PRG05 zgpg30  
 TD 32768  
 SOLVENT CDCl3  
 NS 144  
 DS 2  
 SM 24038.461 Hz  
 SFOSS 0.6813249 Hz  
 RG 47.25 sec  
 DW 20.800 usec  
 DE 6.50 usec  
 TE 296.15 K  
 D11 2.0000000 sec  
 D12 0.1000000 sec  
 TD0 1

CHANNEL F1  
 NUQ1 13C  
 P1 8.90 usec  
 PL1 54.0000000 dB  
 SFO1 100.6278998 MHz

CHANNEL F2  
 waltz16

CPDPRG2  
 NUQ2 1H  
 P2 80.00 usec  
 PL2 12.0000000 dB  
 FWHM2 0.40792399 K  
 PLW12 0.28107001 W  
 SFO2 400.1516006 MHz

F2 - Processing parameters  
 SF 100.6177984 MHz  
 WDW EM  
 SSB 0  
 LB 1.00 Hz  
 GB 0  
 PC 1.40

1H OF VBNC-196

7.621  
7.601  
7.221  
7.201  
7.192  
7.189  
7.172  
7.092  
7.071

5.623  
5.608  
5.594  
5.167

3.224  
3.211  
3.199

2.354

1.948

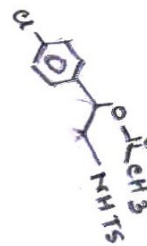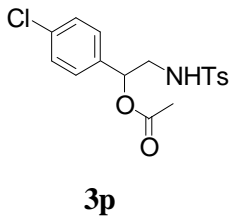

3p

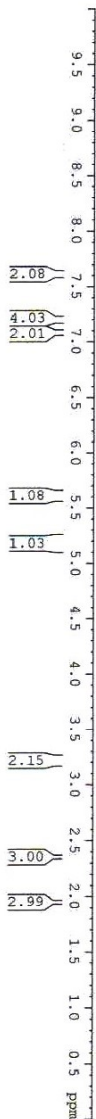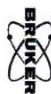

Current Data Parameters  
NAME Df. A WATER  
EXRNO 1053  
PROCNO 1

F2 - Acquisition Parameters

Date 20150301  
Time 16.58  
INSTRUM spect  
PROBHD 5 mm PABBO BB/  
PULPROG zg30  
TD 32768  
SOLVENT CDCl3  
NS 24  
DS 2  
SWH 8233.682 Hz  
FIDRES 0.224691 Hz  
RG 1.9923444 sec  
RG 57.28  
DE 60.800 usec  
TE 297.1 K  
D1 1.00000000 sec  
TD0 1

===== CHANNEL F1 =====

NUC1 1H  
P1 14.75 usec  
PLM1 11.99499689 W  
SF01 400.1524711 MHz  
F2 - Processing parameters  
SI 32768  
SF 400.1500376 MHz  
WDW EM  
SSB 0  
LB 0.30 Hz  
GB 0  
PC 1.00

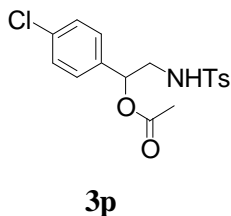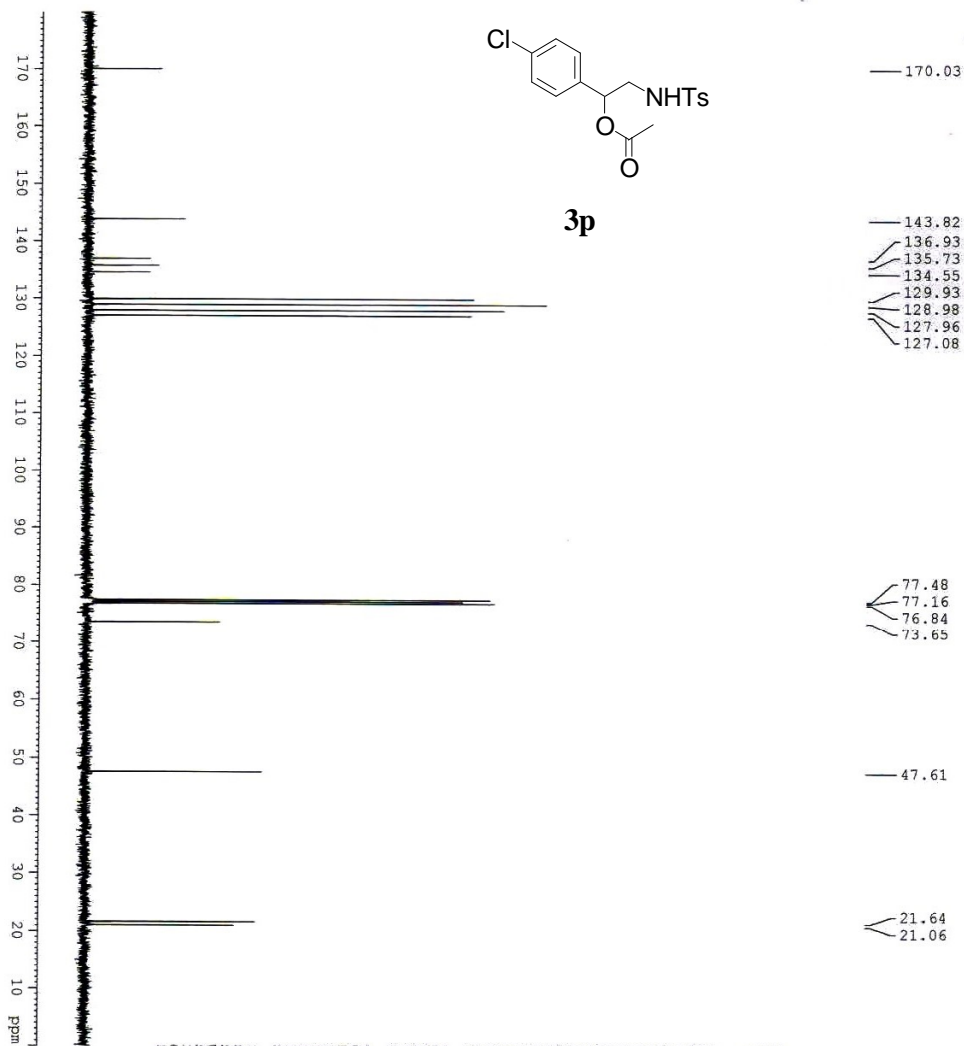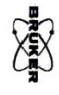

Current Data Parameters  
 NAME Dr. A. VOJSE  
 EXNO 1054  
 PROCNO 1

F2 - Acquisition Parameters  
 Date\_ 20150301  
 Time 17.08  
 INSTRUM spect  
 PROBD 5 mm PABBO BB/  
 PULPROG zgpg30  
 TD 32768  
 SFO2 400.1516006 MHz  
 SOLVENT CDCl3  
 NS 106  
 DS 2  
 SS 1  
 FIDRES 24038.463 Hz  
 AQ 0.733596 Hz  
 RG 0.6816244 sec  
 DW 57.28  
 DE 20.800 usec  
 TE 297.3 K  
 D1 2.00000000 sec  
 D11 0.03000000 sec  
 TDO 1

===== CHANNEL f1 =====  
 NUC1 13C  
 P1 8.90 usec  
 PLM1 54.0000000 W  
 SFO1 100.62782588 MHz

===== CHANNEL f2 =====  
 CPDPRG2 waitz16  
 NUC2 1H  
 P2 18.00 usec  
 PLM2 12.0000000 W  
 SFO2 400.1516006 MHz

F2 - Processing parameters  
 SI 16384  
 SF 100.6177587 MHz  
 WDW EM  
 SSB 0  
 GB 0  
 PC 1.40

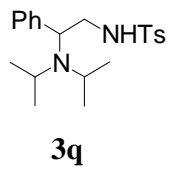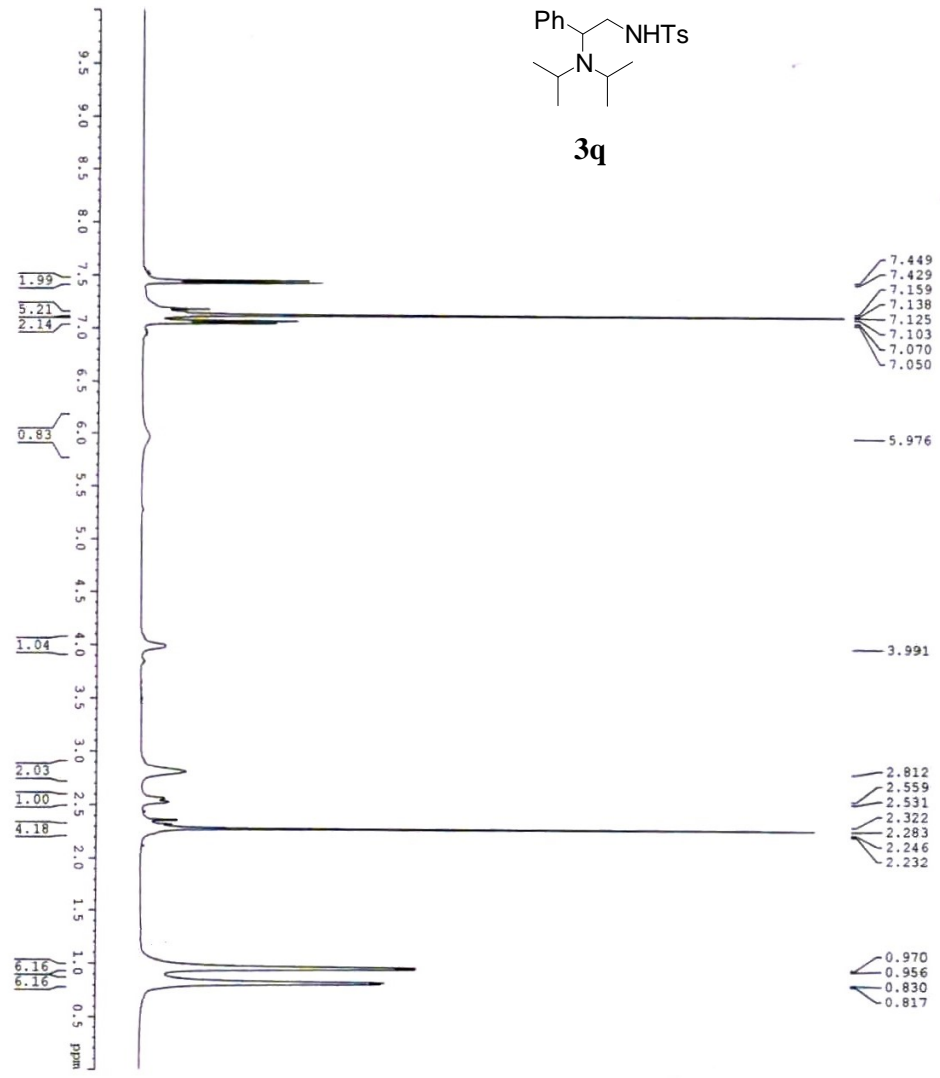

- 7.449
- 7.429
- 7.159
- 7.138
- 7.125
- 7.103
- 7.070
- 7.050
- 5.976
- 3.991
- 2.812
- 2.559
- 2.531
- 2.322
- 2.283
- 2.246
- 2.232
- 0.970
- 0.956
- 0.830
- 0.817

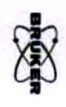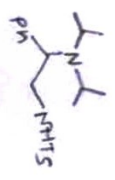

Current Data Parameters  
 NAME Dr. A MAJE  
 EXNO 1041  
 PROCNO 1

F2 - Acquisition Parameters  
 Date\_ 20150201  
 Time 15.11  
 INSTRUM spect  
 PROBHD 5 mm PABBO BB/  
 PULPROG zg30  
 TD 32768  
 SOLVENT CDCl3  
 NS 24  
 DS 2  
 SWH 8223.685 Hz  
 FIDRES 0.250967 Hz  
 AQ 1.9923444 sec  
 RG 32.25  
 DW 60.800 usec  
 DE 6.50 usec  
 TE 295.9 K  
 T1 1.00000000 sec  
 T10 1

CHANNEL f1  
 NUC1 1H  
 P1 14.75 usec  
 PL1 11.9949989 W  
 SFO1 400.1524711 MHz

F2 - Processing parameters  
 SI 4684  
 SF 400.150043 MHz  
 MDW EM  
 SSB 0  
 LB 0.30 Hz  
 GB 0  
 PC 1.00

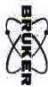

Current Data Parameters

NAME: DR. A WATERS  
 DATE: 10/2  
 PROCNM: 1

F2 - Acquisition Parameters

Date\_ 20150201  
 Time 13.41  
 INSTRUM 1H NMR  
 PROBHD 5 mm PABBO 1H/1  
 PULPROG zgpg30  
 TD 32768  
 SOLVENT CDCl3  
 NS 289  
 DS 4  
 SFO 24038.451 Hz  
 FIDRESS 0.733595 Hz  
 AQ 0.6816244 sec  
 RG 32.25  
 DW 20.800 usec  
 DE 6.50 usec  
 TE 300.2 K  
 D1 2.0000000 sec  
 D11 0.03000000 sec  
 TDO 1

CHANNEL F1

NUC1 13C  
 P 13C usec  
 PLM1 54.00000000 W  
 SFO1 100.6278588 MHz

CHANNEL F2

NAME waltz16  
 NS 16  
 BPCPDZ 80.00 usec  
 PLM2 12.00000000 W  
 PLM12 0.40792999 W  
 PLM13 0.26107001 W  
 SFO2 400.1516006 MHz

F1 - Processing Parameters

SI 16384  
 SF 100.6177895 MHz  
 WDW 0  
 SSB 0  
 LB 1.00 Hz  
 GB 0  
 SC 1.40

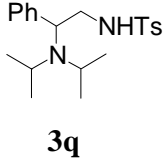

- 143.03
- 136.88
- 129.76
- 129.20
- 128.31
- 127.58
- 127.50
- 127.30
- 77.48
- 77.16
- 76.84
- 55.43
- 51.36
- 47.37
- 22.70
- 21.55
- 18.94

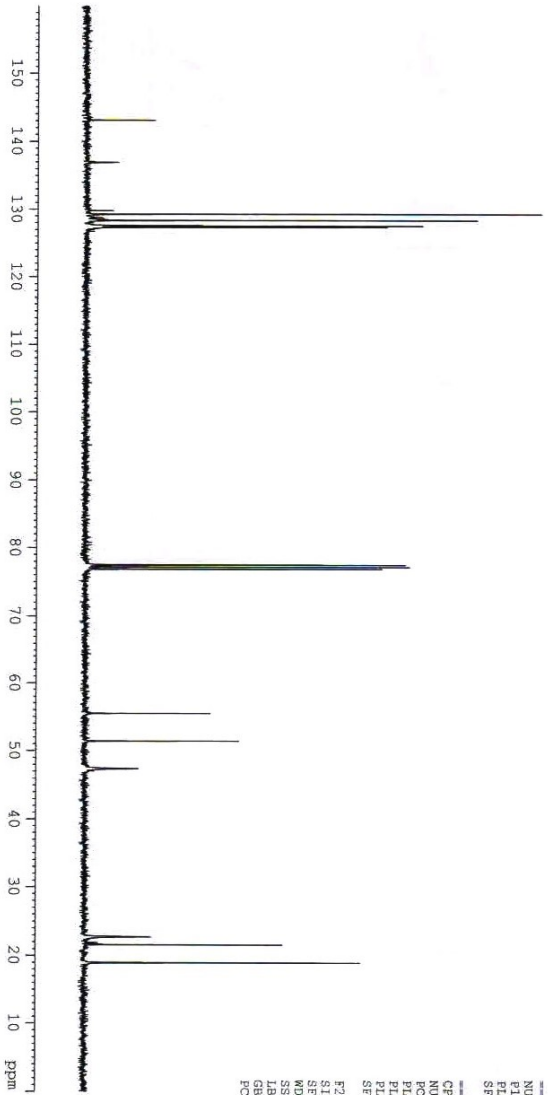

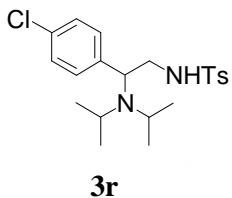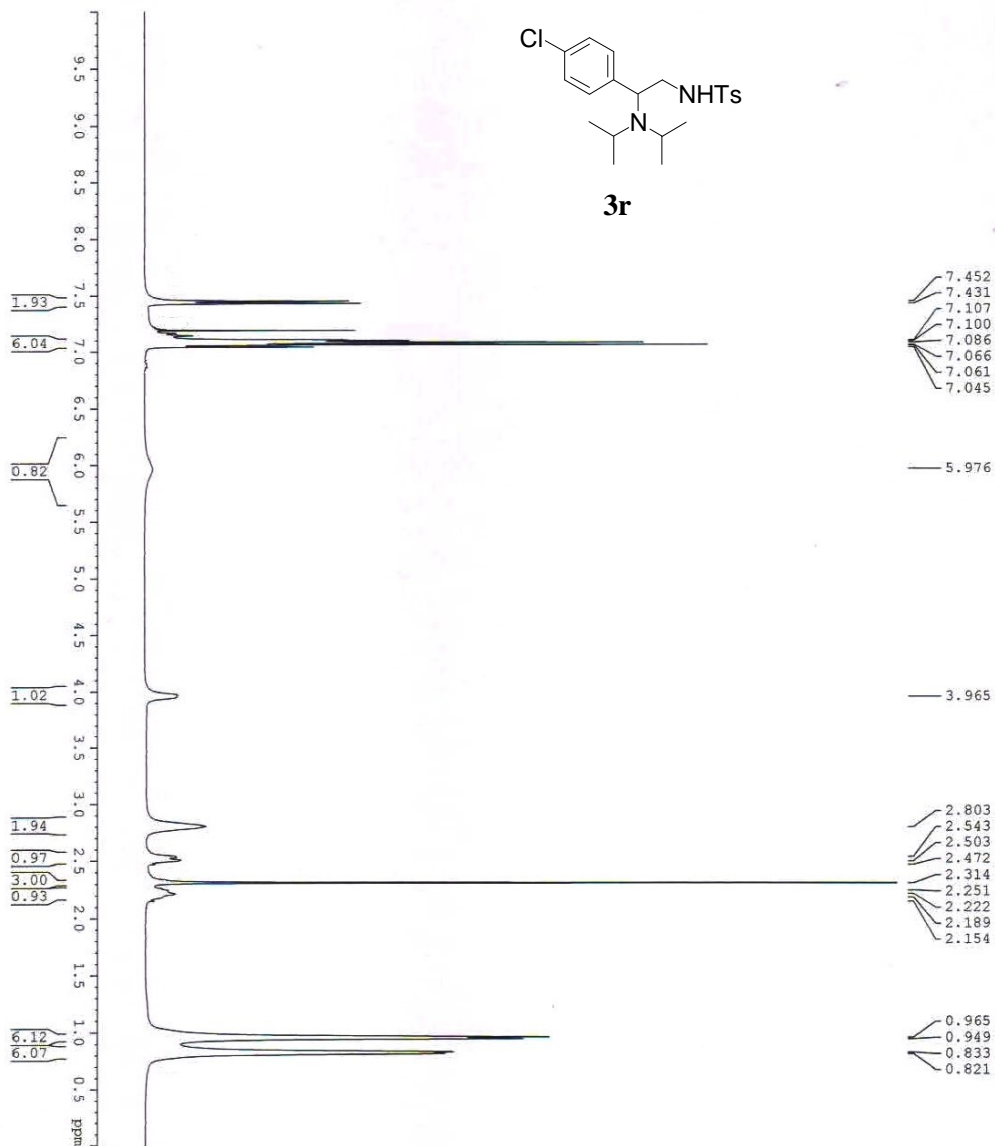

- 7.452
- 7.431
- 7.107
- 7.100
- 7.086
- 7.066
- 7.061
- 7.045
- 5.976
- 3.965
- 2.803
- 2.543
- 2.503
- 2.472
- 2.314
- 2.251
- 2.222
- 2.189
- 2.154
- 0.965
- 0.949
- 0.833
- 0.821

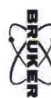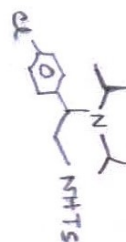

Current Data Parameters  
 NAME Dr. A MAJEE  
 EXPNO 1055  
 PROCNO 1

F2 - Acquisition Parameters

Date\_ 20150303  
 Time 16.28  
 INSTRUM spect  
 PROBD 5 mm PABBO BR/  
 PULPROG zg30  
 TD 32768  
 SOLVENT CDCl3  
 NS 32  
 SH 1  
 SFO 8223.682 Hz  
 FIDRES 0.2510967 Hz  
 AQ 1.9623444 sec  
 RG 67.81  
 DW 60.880 usec  
 DE 6.50 usec  
 TE 296.8 K  
 D1 1.00000000 sec  
 TDO 1

CHANNEL F1

NUC1 <sup>1</sup>H  
 P1 14.75 usec  
 PLM1 11.9949989 W  
 SFO1 400.1524711 MHz

F2 - Processing parameters  
 SI 16384  
 SF 400.1500366 MHz  
 WDW EM  
 SSB 0  
 LB 0.30 Hz  
 GB 0  
 FC 1.00



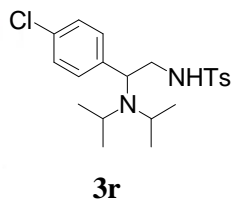

143.36  
136.76  
129.82  
129.32  
128.68  
128.53  
127.55  
127.30

77.48  
77.16  
76.84

54.90  
51.26  
47.44

22.72  
21.59  
18.98

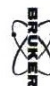

Current Data Parameters  
NAME Dr. A.VAJEE  
EXPRNO 1056  
PROCNO 1

F2 - Acquisition Parameters  
Date\_ 20150303  
Time 16.57  
INSTRUM spect  
PROBHD 5 mm PABBO BB/  
PULPROG zgpg30  
TD 65536  
SOLVENT CDCl3  
NS 316  
DS 2  
SWH 24038.461 Hz  
FIDRESS 31314.6 Hz  
AQ 0.681424 sec  
RG 67.81  
DM 20.800 usec  
DE 6.50 usec  
TE 297.3 K  
F2 2.0027000 sec  
D11 0.03000000 sec  
TD0 1

CHANNEL F1  
NUC1 13C  
P1 8.00 usec  
PL1 0.00 dB  
SFO1 100.6278588 MHz

CHANNEL F2  
CPDPRG2 waltz16  
NUC2 1H  
P2 12.00 usec  
PL2 0.00 dB  
PLM12 0.40792999 W  
PLM13 0.26107001 W  
SFO2 400.1516006 MHz

F2 - Processing parameters  
SI 16384  
SF 100.6177848 MHz  
WDW EM  
SSB 0  
LB 1.00 Hz  
GB 0  
PC 1.10

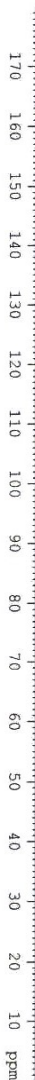

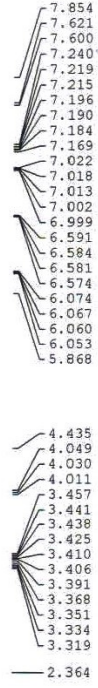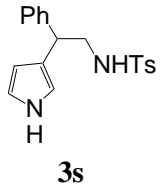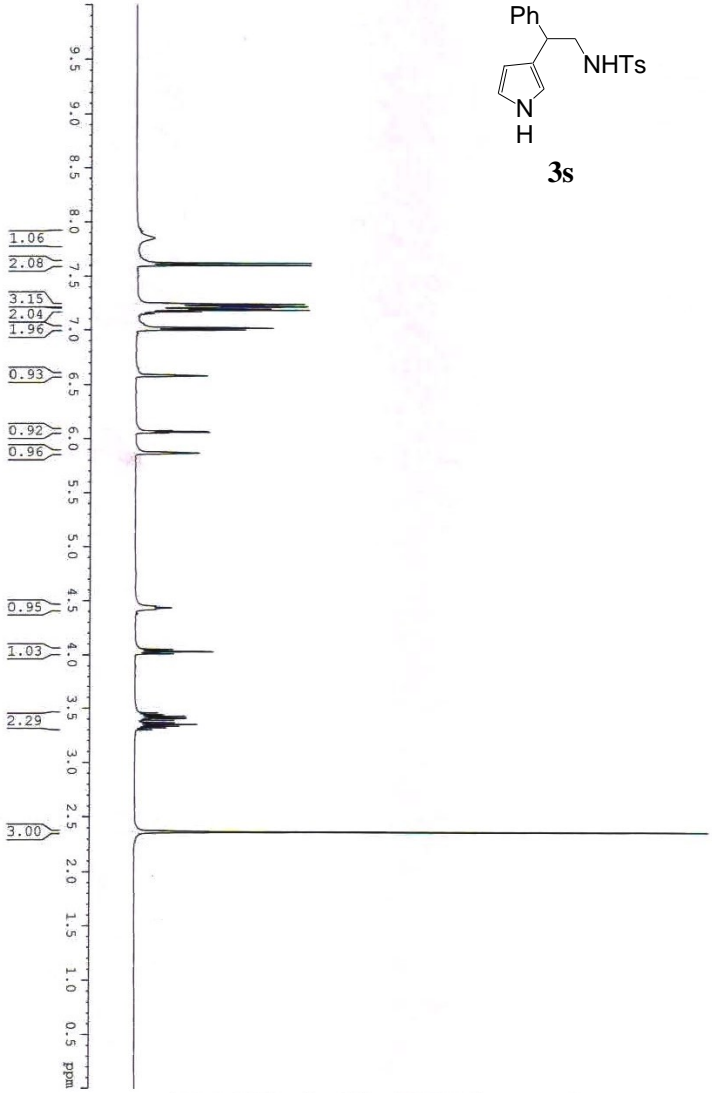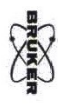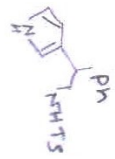

Current Data Parameters  
 NAME: Dr. A MAJE  
 EXPNO: 1057  
 PROCNO: 1

F2 - Acquisition Parameters  
 Date\_ Time: 20150307 13:20  
 INSTRUM: spect  
 PROBRD: 5 mm PABBO BB/  
 PULPROG: zg30  
 TD: 32768  
 SOLVENT: CDCl3  
 NS: 32  
 DS: 2  
 SWH: 8223.689 Hz  
 FIDRES: 0.629467 Hz  
 AQ: 1.992844 sec  
 RG: 43.146  
 DW: 60.800 usec  
 DE: 6.50 usec  
 TE: 296.1 K  
 D1: 1.00000000 sec  
 TDO: 1

CHANNEL F1  
 NUCL1: 1H  
 P1: 14.71 usec  
 PL1: 11.9945968 W  
 SFO1: 400.1524711 MHz

F2 - Processing parameters  
 SI: 16384  
 SF: 400.1500392 MHz  
 WDW: EM  
 SSB: 0  
 LB: 0.30 Hz  
 GB: 0  
 PC: 1.00

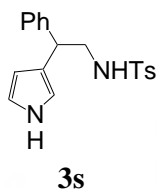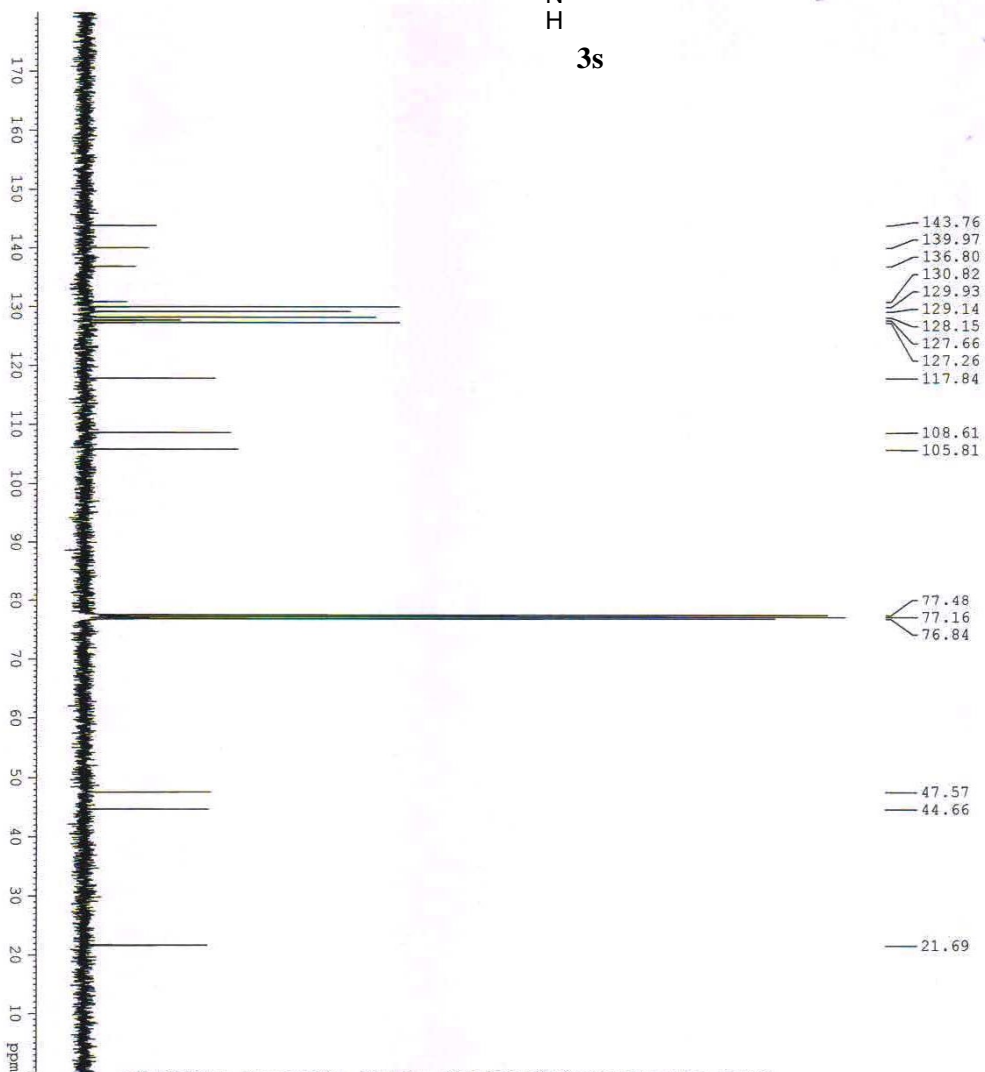

- 143.76
- 139.97
- 136.80
- 130.82
- 129.93
- 129.14
- 128.15
- 127.66
- 127.26
- 117.84
  
- 108.61
- 105.81
  
- 77.48
- 77.16
- 76.84
  
- 47.57
- 44.66
  
- 21.69

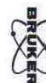

Current Data Parameters  
 NAME: OF\_ A WADDE  
 EXPNO: 1079  
 PROCNO: 1

F2 - Acquisition Parameters  
 Date\_: 20150307  
 Time: 13:41  
 Name: 13c41  
 PULPROG: zgpg30  
 TD: 32768  
 SOLVENT: CDCl3  
 NS: 180  
 DS: 2  
 SWH: 24038.461 Hz  
 FIDRES: 0.733596 Hz  
 AQ: 0.6818244 sec  
 RG: 93.46  
 DM: 20.900 usec  
 DE: 1.00 usec  
 TE: 297.2 K  
 D1: 2.00000000 sec  
 D11: 0.03000000 sec  
 TDO: 1

CHANNEL f1  
 NUC1: 13C  
 P1: 8.90 usec  
 PLM1: 54.0000000 W  
 SFO1: 100.6278588 MHz

CHANNEL f2  
 NUC2: 1H  
 P2: 12.0000000 W  
 PLM2: 12.0000000 usec  
 SFO2: 400.151606 MHz

CPDPRG2: waltz16

E2 - Processing parameters  
 SI: 32768  
 SF: 100.6177834 MHz  
 WDW: EM  
 SSB: 0  
 LB: 1.00 Hz  
 GB: 0  
 PC: 1.40

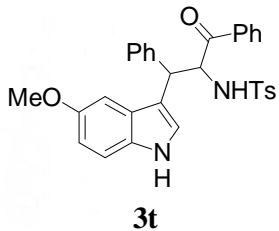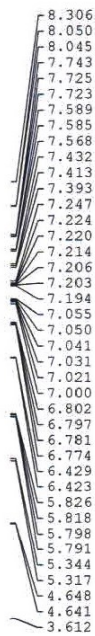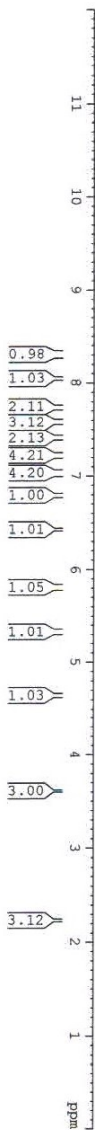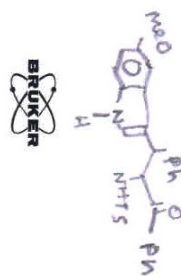

Current Data Parameters  
 NAME Dr. A. MAJBE  
 EKXNO 1080  
 PROCNO 1

F2 - Acquisition Parameters  
 Date\_ 20150420  
 Time 15.05  
 INSTRUM spect  
 PROBHD 5 mm PABBO BB/  
 PULPROG zg30  
 TD 2436  
 FIDRES 32.768  
 SOLVENT CDCl3  
 NS 24  
 DS 2  
 SFR 8223.685 Hz  
 FTRES 0.250967 Hz  
 RG 1.9923444 sec  
 DW 47.25  
 DE 60.800 usec  
 TE 6.50 usec  
 TD 296.5 K  
 D1 1.00000000 sec  
 TDO 1

CHANNEL F1  
 NUCL 1H  
 P1 14.75 usec  
 PLM1 11.99499989 W  
 SFO1 400.1524711 MHz  
 F2 - Processing parameters  
 SI 163984  
 SF 400.1500000 MHz  
 KIDW EM  
 SSB 0  
 LB 0 0.30 Hz  
 GB 0  
 PC 1.00

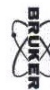

Current Data Parameters  
 NAME Dr. A MAJEE  
 EXNO I081  
 PROCNO 1

F2 - Acquisition Parameters

Date 20150420  
 Time 15.33  
 INSTRUM spect  
 PROBHD 5 mm PABBO Bb/  
 PULPROG zgpg30  
 TD 299420  
 FIDRES 0.133596 Hz  
 SOLVENT CDCl3  
 NS 320  
 DS 2  
 SSWH 24038.461 Hz  
 FIDRES 0.733596 Hz  
 AQ 0.6816244 sec  
 RG 110  
 RB 20.60 usec  
 DE 6.50 usec  
 TE 297.8 K  
 D1 2.00000000 sec  
 D11 0.03000000 sec  
 TD0 1

===== CHANNEL f1 =====

NUC1 13C  
 P1 8.90 usec  
 PLM1 54.00000000 W  
 SFO1 100.6278588 MHz

===== CHANNEL f2 =====

CPDPRG2 waltz16  
 NUC2 1H  
 PCPD2 80.00 usec  
 PLM2 12.00000000 W  
 PLM12 0.40792999 W  
 PLM13 0.26107001 W  
 SFO2 400.1516006 MHz

F2 - Processing parameters

SI 16384  
 SF 100.6177901 MHz  
 WDW EM  
 SSB 0  
 LB 1.00 Hz  
 GB 0  
 PC 1.40

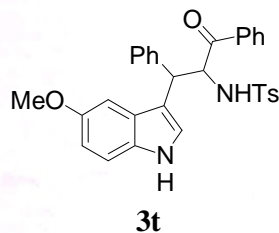

- 196.10
- 153.80
- 143.71
- 137.26
- 136.23
- 134.36
- 133.96
- 131.31
- 129.61
- 129.56
- 128.90
- 128.35
- 128.23
- 127.56
- 127.47
- 127.36
- 124.12
- 114.92
- 112.00
- 111.95
- 101.14
- 77.48
- 77.16
- 76.84
- 60.49
- 55.78
- 45.11
- 21.45

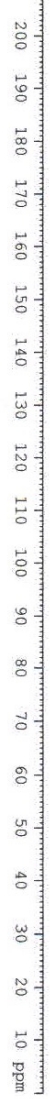

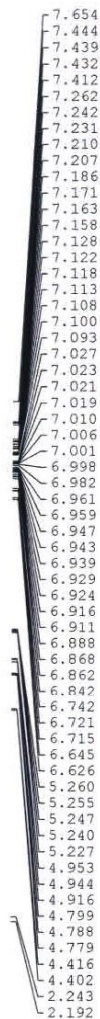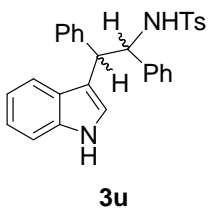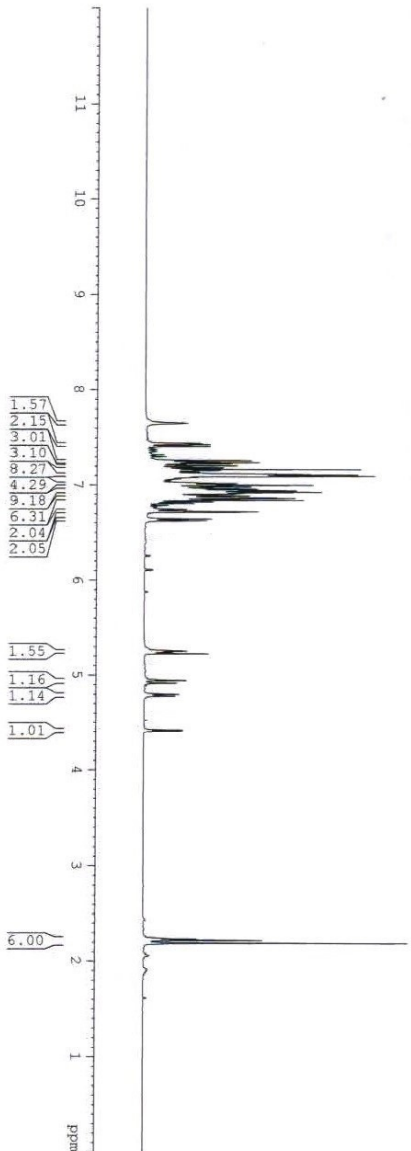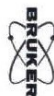

Current Data Parameters  
 NAME Dr. A VAJEE 2015  
 EXPNO 74  
 PROCNO 1

F2 - Acquisition Parameters  
 Date\_ 20150806  
 Time 18.23  
 INSTRUM spect  
 PROBHD 5 mm PABBO BB/  
 PULPROG zg30  
 TD 32768  
 SOLVENT CDCl3  
 NS 24  
 DS 2  
 SWH 8223.685 Hz  
 FIDRES 0.250967 Hz  
 AQ 1.9923444 sec  
 RG 93.46  
 DW 60.800 usec  
 DE 6.50 usec  
 TE 298.0 K  
 D1 1.00000000 sec  
 TDO 1

===== CHANNEL f1 =====  
 NUC1 1H  
 P1 14.76 usec  
 PL1 11.99469989 W  
 SFO1 400.1524711 MHz  
 F2 - Processing parameters  
 SI 16384  
 SF 400.1500447 MHz  
 WDW EM  
 SSB 0  
 LB 0.30 Hz  
 GB 0  
 PC 1.00

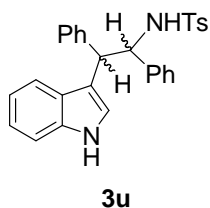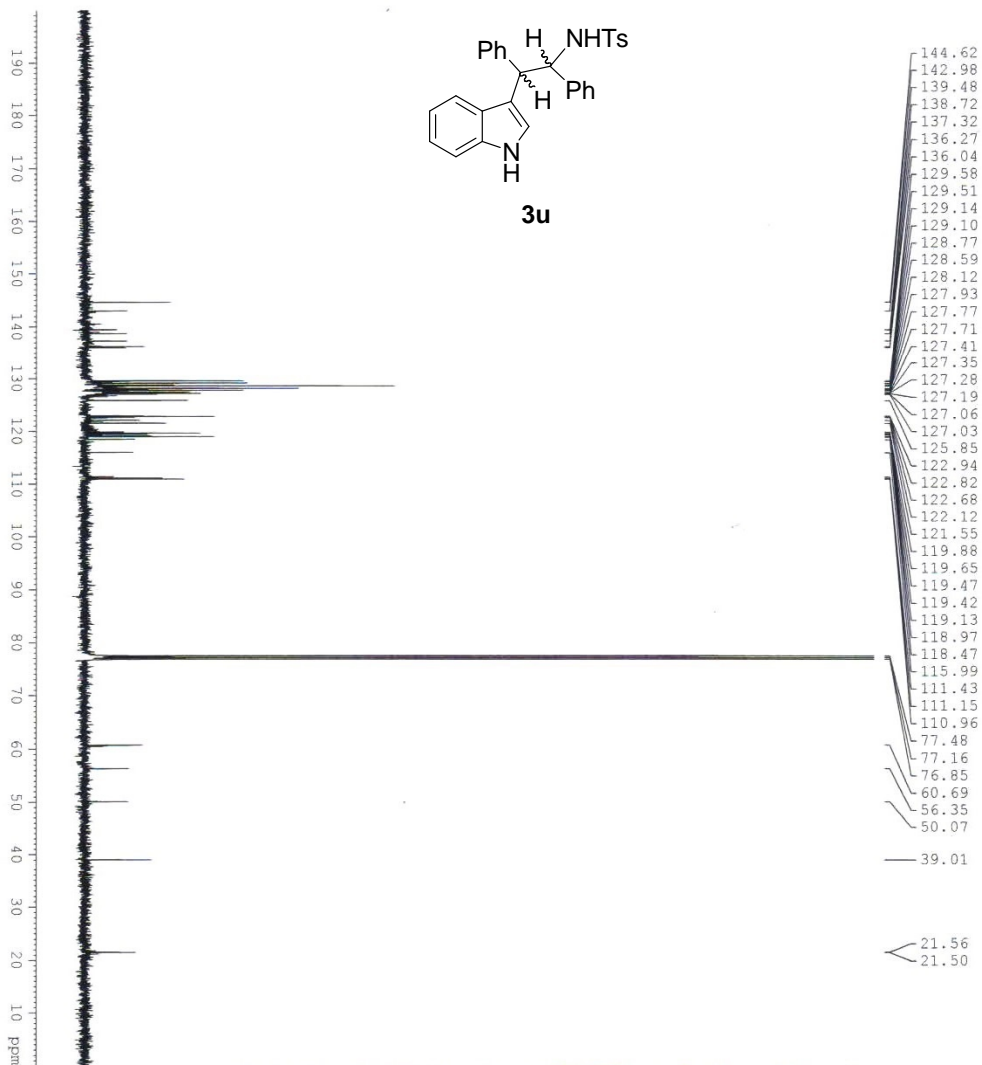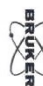

Current Data Parameters  
 Name VBNC-262  
 Dir. R\_KM/DB\_75  
 EXPNO 1  
 PROCNO 1

F2 - Acquisition Parameters  
 Date\_ 20110904  
 Time 13:04  
 INSTRUM spect  
 PROBNM 5 mm PABBO BB/  
 PULPROG zgpg30  
 TD 32768  
 SFO 400.1516006  
 SOLVENT CDCl3  
 NS 2  
 DS 2  
 SWH 24038.461 Hz  
 FIDRES 0.731596 Hz  
 AQ 0.681674 sec  
 RG 655.36  
 TACQ 20.400 usec  
 DEC 6.50 usec  
 FE 259.2 K  
 D1 2.00000000 sec  
 D11 0.03000000 sec  
 D12 1

CHANNEL F1  
 NUC1 13C  
 P1 8.90 usec  
 PL1 14.00000000 W  
 SFO1 100.6218998 MHz

CHANNEL F2  
 NUC2 1H  
 P2 90.00 usec  
 PL2 12.00000000 W  
 PLM12 0.40792399 W  
 PLM13 0.26107001 W  
 SFO2 400.1516006 MHz

F2 - Processing Parameters  
 SI 16384  
 SF 100.617851 MHz  
 KW 5M  
 SSB 0  
 LB 1.00 Hz  
 GB 0  
 PC 1.40
